# Supplementary material for: Integrated volatile metabolomic and transcriptomic analysis provides insights into the regulation of floral scents between two contrasting varieties of Lonicera japonica
Source: Front Plant Sci. 2022 Sep 12;13:989036. doi: 10.3389/fpls.2022.989036 (PMC9510994; doi:10.3389/fpls.2022.989036)
Supplement: Supplementary file 2 [file Table_2.XLSX]

## Sheet: Sheet1
Supplementary Table 2. Volatile profiling of Lonicera japonica flowers using HS-SPME coupled with GC-MS methods
Index	Molecular Weight (Da)	Formula	RI	NIST_RI	Compounds	Class I	CAS	Match factor	F1_V_1	F1_V_2	F1_V_3	Y2_V_1	Y2_V_2	Y2_V_3	mix01	mix02	mix03	cpd_ID	kegg_map
KMW0574	176.084	C11H12O2	1468.65	1469	2-Propenoic acid, 3-phenyl-, ethyl ester	Ester	103-36-6	95.4	5.22349e+06	4.17188e+06	3.38047e+06	3.00936e+07	2.53211e+07	2.97972e+07	1.76355e+07	1.99761e+07	1.60079e+07	C06359	--
NMW0328	180.058	C13H8O	1478.89	1752	9H-Fluoren-9-one	Aromatics	486-25-9	62.8	2.1198e+07	1.91378e+07	1.81137e+07	2.36957e+07	2.26972e+07	2.35272e+07	2.52785e+07	2.42963e+07	2.3022e+07	C06712	ko01100
KMW0088	98.073	C6H10O	853.8	854	2-Hexenal, (E)-	Aldehyde	6728-26-3	94.4	1.92931e+07	1.87082e+07	1.66235e+07	2.32518e+07	2.53225e+07	1.17103e+07	1.11089e+07	2.24654e+07	1.72891e+07	C08497	--
KMW0709	284.272	C18H36O2	1996.49	1993	Hexadecanoic acid, ethyl ester	Ester	628-97-7	75.7	1.82366e+07	1.45807e+07	1.86135e+07	1.5479e+07	1.32488e+07	1.40731e+07	1.98371e+07	1.92113e+07	1.77055e+07	--	--
XMW0817	204.188	C15H24	1453.14	1492	(1S,5S,6R)-6-Methyl-2-methylene-6-(4-methylpent-3-en-1-yl)bicyclo[3.1.1]heptane	Terpenoids	15438-94-5	83.9	6.57072e+06	5.37114e+06	5.56009e+06	1.48885e+07	1.38635e+07	1.32509e+07	1.1185e+07	1.26303e+07	1.18425e+07	--	--
XMW1497	252.209	C16H28O2	1692.76	1690	6,11-Undecadiene, 1-acetoxy-3,7-dimethyl-	Ester	1000150-66-0	61.0	1.26885e+07	8.86084e+06	9.87572e+06	1.44856e+07	1.08809e+07	1.31662e+07	1.3966e+07	1.37996e+07	1.06689e+07	--	--
NMW0310	222.198	C15H26O	1717.37	1682	farnesol (2,6,10-Dodecatrien-1-ol, 3,7,11-trimethyl-)	Terpenoids	4602-84-0	96.3	1.14931e+06	592078	759707	1.11778e+07	7.51569e+06	1.29296e+07	1.01626e+07	7.62577e+06	5.21703e+06	C01126	ko00900,ko00909,ko01110
XMW0947	182.131	C11H18O2	1321.49	1319	(E)-Hex-3-enyl (E)-2-methylbut-2-enoate	Ester	1000373-74-1	98.5	1.57475e+07	1.51203e+07	1.49619e+07	1.05984e+07	1.22197e+07	9.51341e+06	1.38642e+07	1.57817e+07	1.30688e+07	--	--
KMW0291	154.136	C10H18O	1100.88	1100	Linalool	Terpenoids	78-70-6	92.4	1.03799e+07	9.60021e+06	8.86156e+06	1.05548e+07	1.22403e+07	9.30548e+06	1.05417e+07	1.24826e+07	9.82136e+06	C03985	--
KMW0613	204.188	C15H24	1504.15	1500	.alpha.-Farnesene	Terpenoids	502-61-4	74.5	3.83803e+06	3.06451e+06	3.73122e+06	9.23971e+06	8.68888e+06	8.26993e+06	6.88321e+06	7.8134e+06	6.81492e+06	C09665	ko00909,ko01110
XMW2631	222.198	C15H26O	1480.35	1627	Epicubenol	Terpenoids	19912-67-5	73.5	7.16829e+06	7.23835e+06	6.25463e+06	8.32311e+06	8.14936e+06	6.97876e+06	7.27393e+06	8.21931e+06	8.35386e+06	--	--
KMW0173	128.12	C8H16O	981.87	982	1-Octen-3-ol	Alcohol	3391-86-4	93.4	4.89838e+06	4.44255e+06	5.05372e+06	7.80689e+06	1.1167e+07	5.03122e+06	4.60963e+06	8.25313e+06	5.45614e+06	C14272	--
KMW0618	204.188	C15H24	1522.66	1519	delta-cadinene (1,2,3,5,6,8a-hexahydro-4,7-dimethyl-1-(1-methylethyl)-	Terpenoids	483-76-1	93.5	1.97474e+07	1.61623e+07	1.89042e+07	7.53835e+06	9.42166e+06	7.20333e+06	1.42695e+07	1.67867e+07	1.40383e+07	C06394	ko00909,ko01100,ko01110
KMW0555	204.188	C15H24	1489.71	1431	trans-.alpha.-Bergamotene	Terpenoids	13474-59-4	62.6	879858	774113	867656	6.42883e+06	5.79927e+06	5.63912e+06	3.57765e+06	4.09819e+06	3.80643e+06	C20811	--
KMW0503	151.063	C8H9NO2	1342.7	1337	Methyl anthranilate	Ester	134-20-3	93.2	61968.8	25402.9	31148.5	6.03968e+06	5.218e+06	7.00076e+06	2.63371e+06	2.54792e+06	1.94567e+06	C20634	--
XMW2711	192.151	C13H20O	1481.39	1476	2-(1,1-Dimethylethyl)-6-(1-methylethyl)phenol	Phenol	22791-95-3	62.7	6.70212e+06	5.91267e+06	5.37343e+06	5.53677e+06	4.55011e+06	4.82455e+06	5.60843e+06	6.1413e+06	5.33754e+06	--	--
KMW0460	154.136	C10H18O	1249.5	1276	Geraniol	Terpenoids	106-24-1	97.8	2.3214e+06	1.6851e+06	1.53713e+06	5.44949e+06	4.68198e+06	5.67798e+06	4.46384e+06	4.23052e+06	3.34466e+06	C01500	ko00902,ko01100,ko01110
WMW0049	194.167	C13H22O	1446.8	1435	5,9-Undecadien-2-one, 6,10-dimethyl-, (Z)-	Ketone	3879-26-3	88.4	4.94915e+06	4.10178e+06	4.25115e+06	5.40387e+06	5.27429e+06	5.46547e+06	5.17151e+06	5.49588e+06	4.64656e+06	--	--
XMW0004	136.125	C10H16	991.17	943	Bicyclo[3.1.1]heptane, 6,6-dimethyl-2-methylene-, (1S)-	Terpenoids	18172-67-3	89.9	4.25503e+06	4.8453e+06	4.49907e+06	5.2097e+06	6.81213e+06	2.67003e+06	2.73321e+06	5.34663e+06	4.88935e+06	C06307	ko00902,ko01110
KMW0638	238.193	C15H26O2	992.05	1610	Geranyl isovalerate	Ester	109-20-6	83.4	4.22138e+06	4.81358e+06	4.4648e+06	5.17995e+06	6.76968e+06	2.65022e+06	2.71284e+06	5.32548e+06	4.8605e+06	--	--
KMW0616	204.188	C15H24	1518.26	1543	(1.alpha.,4a.beta.,8a.alpha.)-1,2,3,4,4a,5,6,8a-octahydro-7-methyl-4-methylene-1-(1-methylethyl)-Naphthalene	Terpenoids	39029-41-9	97.4	1.45049e+07	1.13655e+07	1.46687e+07	5.05728e+06	6.39727e+06	4.59137e+06	1.03056e+07	1.22972e+07	9.96429e+06	C19738	--
KMW0676	256.24	C16H32O2	1791.6	1694	Tetradecanoic acid, ethyl ester	Ester	124-06-1	95.0	6.27804e+06	4.98475e+06	6.60301e+06	4.60929e+06	3.78022e+06	3.9385e+06	6.62842e+06	6.64697e+06	5.63176e+06	--	--
XMW2330	306.256	C20H34O2	2171.33	2169	(Z,Z,Z)-9,12,15-Octadecatrienoic acid, ethyl ester	Ester	1191-41-9	92.6	5614371	3991294	5467334	4413298	3896198	3843768	6313236	5842658	5760370	--	--
KMW0102	102.104	C6H14O	802.01	851	1-Hexanol	Alcohol	111-27-3	70.5	3.86218e+06	4.29553e+06	4.10782e+06	3.81243e+06	7.86538e+06	1.53876e+06	1.68174e+06	4.98939e+06	2.57506e+06	--	--
XMW0136	200.157	C15H20	1545.94	1542	4-Isopropyl-6-methyl-1-methylene-1,2,3,4-tetrahydronaphthalene	Terpenoids	50277-34-4	93.3	8.77076e+06	7.82037e+06	8.65242e+06	3.73886e+06	4.49685e+06	3.10427e+06	5.78947e+06	7.52256e+06	6.60963e+06	--	--
KMW0626	202.172	C15H22	1525.71	1523	Naphthalene, 1,2,3,4-tetrahydro-1,6-dimethyl-4-(1-methylethyl)-, (1S-cis)-	Terpenoids	483-77-2	88.4	9.64576e+06	9.77442e+06	1.08273e+07	3.62486e+06	5.17192e+06	2.69062e+06	5.10282e+06	8.11699e+06	7.06023e+06	--	--
XMW2655	98.073	C6H10O	801.31	797	4-Hexyn-3-ol	Alcohol	20739-59-7	64.9	2.91447e+06	3.71435e+06	3.36352e+06	3.49086e+06	6.05258e+06	1.89076e+06	1.76031e+06	3.59917e+06	2.48045e+06	--	--
KMW0143	116.12	C7H16O	902.71	925	2-Heptanol	Alcohol	543-49-7	94.1	9.17811e+06	8.94968e+06	1.00114e+07	3.44401e+06	5.97669e+06	1.90405e+06	4.07553e+06	8.39285e+06	5.51992e+06	--	--
XMW0434	142.099	C8H14O2	2170.78	992	4-Hexen-1-ol, acetate	Others	72237-36-6	66.9	4.43539e+06	3.10886e+06	4.13244e+06	3.31807e+06	3.02111e+06	3.0695e+06	4.93876e+06	4.47119e+06	4.43313e+06	--	--
KMW0630	222.198	C15H26O	1560.83	1539	1,6,10-Dodecatrien-3-ol, 3,7,11-trimethyl-, (E)-	Terpenoids	40716-66-3	95.7	675278	431829	497336	3.28923e+06	2.48294e+06	3.62651e+06	2.65268e+06	2.31188e+06	1.7509e+06	--	--
D423	190.099	C12H14O2	1497.81	1498	Benzyl tiglate	Ester	37526-88-8	64.6	9.54581e+06	6.58756e+06	9.24713e+06	3.10646e+06	3.94817e+06	3.14939e+06	7.47097e+06	7.76225e+06	6.20279e+06	--	--
KMW0441	164.084	C10H12O2	1241.67	1252	Benzeneacetic acid, ethyl ester	Aromatics	101-97-3	78.2	5.59639e+06	4.25181e+06	3.68831e+06	3.06426e+06	3.03472e+06	2.52693e+06	3.58265e+06	4.3343e+06	3.66498e+06	--	--
XMW1496	320.199	C19H28O4	1860.76	2085	Phthalic acid, hept-4-yl isobutyl ester	Ester	1000356-78-3	96.8	2986549	2105284	2890069	3054396	1837303	2325643	3265423	3235435	2867105	--	--
KMW0220	136.125	C10H16	1046.81	1009	3-Carene	Terpenoids	13466-78-9	95.7	4.11801e+06	3.96762e+06	4.52312e+06	3.03554e+06	3.54694e+06	1.75157e+06	2.87333e+06	4.12491e+06	4.16781e+06	--	--
WMW0215	136.125	C10H16	1047.94	1037	.beta.-Ocimene	Terpenoids	13877-91-3	91.6	3.77888e+06	3.67173e+06	4.34726e+06	2.83278e+06	3.42778e+06	1.52688e+06	2.58195e+06	3.84395e+06	3.92677e+06	--	--
WMW0012	204.188	C15H24	1467.94	1435	(+)-epi-Bicyclosesquiphellandrene	Terpenoids	54274-73-6	87.5	7.68329e+06	5.29297e+06	7.52975e+06	2.72622e+06	3.32581e+06	2.74602e+06	5.95304e+06	6.17465e+06	4.87255e+06	--	--
WMW0127	128.12	C8H16O	1054.67	1055	3-Octen-1-ol, (Z)-	Alcohol	20125-84-2	95.5	1.78816e+06	1.81769e+06	1.74106e+06	2.57018e+06	3.09373e+06	2.04085e+06	2.22009e+06	3.13352e+06	2.33074e+06	--	--
XMW1373	312.303	C20H40O2	2190.46	2195	Octadecanoic acid, ethyl ester	Ester	111-61-5	79.7	3.44901e+06	2.64328e+06	3.5379e+06	2.56415e+06	1.99225e+06	2.14581e+06	4.20272e+06	3.90052e+06	3.66318e+06	--	--
w05	220.183	C15H24O	1740.28	1656	2,6,10-Dodecatrienal, 3,7,11-trimethyl-	Terpenoids	19317-11-4	92.0	363657	217614	252479	2.55493e+06	1.96038e+06	2.55313e+06	1.8814e+06	2.05802e+06	1.40732e+06	C03461	ko00900,ko00909,ko01110
KMW0225	100.089	C6H12O	1055.82	1038	3-Hexen-1-ol, (E)-	Alcohol	928-97-2	74.0	1.75044e+06	1.81731e+06	1.70083e+06	2.52638e+06	3.03552e+06	1.93426e+06	1.60577e+06	2.8214e+06	2.22934e+06	--	--
NMW0784	128.084	C7H12O2	939.83	939	Ethyl tiglate	Ester	5837-78-5	98.5	1.18378e+06	1.28161e+06	1.4474e+06	2.46318e+06	7.1462e+06	1.77324e+06	1.5958e+06	3.57069e+06	1.99499e+06	C08487	--
XMW1206	142.099	C8H14O2	1003.18	1005	3-Hexenoic acid, ethyl ester	Ester	2396-83-0	96.9	1.51961e+07	1.48664e+07	1.43372e+07	2.45511e+06	5.31136e+06	2.21058e+06	6.95879e+06	1.1251e+07	7.66699e+06	--	--
NMW0115	148.089	C10H12O	1287.93	1286	Anethole	Terpenoids	104-46-1	94.6	5.84505e+06	458395	1.33597e+06	2.28717e+06	602159	1.84988e+06	426351	323846	594122	C10428	ko00940
NMW0071	154.136	C10H18O	1197.52	1190	L-.alpha.-Terpineol	Terpenoids	10482-56-1	96.5	1.36176e+06	1.11961e+06	1.18705e+06	2.27562e+06	2.32494e+06	1.74218e+06	1.59566e+06	1.94187e+06	1.90026e+06	C11393	ko00902,ko01100,ko01110
XMW2144	322.287	C21H38O2	2161.97	2292	trans,trans-9,12-Octadecadienoic acid, propyl ester	Ester	1000405-14-9	75.4	2209593	1762181	2399557	2226139	1836599	1780584	2743235	2606778	2421634	--	--
WMW0195	282.256	C18H34O2	1981.61	1977	Ethyl 9-hexadecenoate	Ester	54546-22-4	95.6	3.28397e+06	2.43956e+06	3.19644e+06	2.0941e+06	1.775e+06	1.89291e+06	3.24768e+06	3.10441e+06	2.84207e+06	--	--
XMW0822	204.188	C15H24	1435.56	1432	Tricyclo[4.4.0.02,7]decane, 1-methyl-3-methylene-8-(1-methylethyl)-, stereoisomer	Terpenoids	18252-44-3	97.4	6549803	4577159	6424685	2.025e+06	2609656	2385077	5091480	5569226	4256573	--	--
WMW0040	136.125	C10H16	1036.18	1052	trans-.beta.-Ocimene	Terpenoids	3779-61-1	92.9	1.6055e+06	1.7031e+06	1.56628e+06	1.86425e+06	2.40331e+06	972211	1.02475e+06	2.00394e+06	1.73105e+06	C09873	--
KMW0594	228.209	C14H28O2	1590.96	1594	Dodecanoic acid, ethyl ester	Ester	106-33-2	93.1	4.26378e+06	3.69711e+06	4.90691e+06	1.86008e+06	1.59983e+06	1.63604e+06	3.73974e+06	3.87932e+06	3.03792e+06	--	--
WMW0002	204.188	C15H24	1380.65	1221	.alfa.-Copaene	Terpenoids	1000360-33-0	93.6	6.54412e+06	5.06066e+06	6.64305e+06	1.78575e+06	2.49835e+06	1.63639e+06	3.95866e+06	5.12588e+06	4.04692e+06	--	--
XMW0465	204.188	C15H24	1464.77	1469	1-Isopropyl-4,7-dimethyl-1,2,3,4,5,6-hexahydronaphthalene	Terpenoids	16729-00-3	81.0	5.6714e+06	4.56755e+06	5.87289e+06	1.75824e+06	2.24933e+06	1.48889e+06	3.25594e+06	4.55135e+06	3.76499e+06	--	--
XMW0176	204.188	C15H24	1541.25	1440	[1α,4aα,8aα]-1,2,4a,5,6,8a-hexahydro-4-7-dimethyl-1-[1-methylethyl]naphthalene	Terpenoids	31983-22-9	97.4	4.82094e+06	3.65413e+06	4.76226e+06	1.66295e+06	2.06575e+06	1.50095e+06	3.2607e+06	3.9721e+06	3.21385e+06	--	--
WMW0052	204.188	C15H24	1594.19	1533	(E)-1-Methyl-4-(6-methylhept-5-en-2-ylidene)cyclohex-1-ene	Terpenoids	53585-13-0	84.0	243173	216361	225950	1.6161e+06	1.58407e+06	1.18169e+06	759390	1.05046e+06	959690	--	--
XMW0197	204.188	C15H24	1350.74	1440	(1S,4S,4aS)-1-Isopropyl-4,7-dimethyl-1,2,3,4,4a,5-hexahydronaphthalene	Terpenoids	267665-20-3	96.5	4.96191e+06	3.42972e+06	4.94962e+06	1.61193e+06	2.09684e+06	1.52385e+06	3.50231e+06	4.18273e+06	3.23407e+06	--	--
KMW0217	136.125	C10H16	1031.28	1030	D-Limonene	Terpenoids	5989-27-5	95.1	1.50772e+06	1.66543e+06	1.48538e+06	1.58981e+06	2.16276e+06	823747	926564	1.82167e+06	1.61388e+06	C06099	ko00902,ko00903,ko01100,ko01110
XMW0561	264.209	C17H28O2	1833.68	1834	Farnesol, acetate	Ester	1000352-67-2	91.7	739754	463936	638706	1.57335e+06	1.22602e+06	1.49253e+06	1.37925e+06	1.36655e+06	1.07078e+06	--	--
KMW0614	204.188	C15H24	1536.98	1527	Cubenene	Terpenoids	29837-12-5	93.6	5.02964e+06	3.75728e+06	4.96168e+06	1.57296e+06	2.05842e+06	1.39714e+06	3.22628e+06	4.06028e+06	3.23451e+06	--	--
KMW0158	106.042	C7H6O	963.56	960	BenzAldehyde	Aldehyde	100-52-7	89.5	2.03936e+06	2.02388e+06	2.05371e+06	1.4252e+06	1.3373e+06	813543	1.20177e+06	1.8349e+06	1.23875e+06	C00193	--
XMW3115	104.921	CBrN	963.76	-	Cyanogen bromide	Halogenated hydrocarbons	506-68-3	66.6	2.04552e+06	2.01094e+06	2.01718e+06	1.42006e+06	1.35399e+06	852713	1.20786e+06	1.82753e+06	1.22561e+06	--	--
KMW0459	152.12	C10H16O	1267.32	1277	2,6-Octadienal, 3,7-dimethyl-, (E)-	Terpenoids	141-27-5	82.7	616163	555634	458285	1.32443e+06	1.34727e+06	1.39126e+06	933681	1.01629e+06	768680	C01499	ko01110
NMW0437	290.261	C20H34O	1911.33	2034	(E,E)-3,7,11,15-tetramethyl-1,6,10,14-Hexadecatetraen-3-ol	Terpenoids	1113-21-9	89.6	1.73574e+06	1.17859e+06	1.49835e+06	1.26891e+06	1.03464e+06	939723	1.48361e+06	1.68415e+06	1.64461e+06	C20681	ko00904
XMW0272	122.048	C6H6N2O	1172.1	1197	4-Pyridinecarboxamide	Heterocyclic compound	1453-82-3	71.2	3.01223e+07	2.95485e+07	2.72316e+07	1.24113e+06	1.29001e+06	1.04197e+06	1.99492e+07	2.15336e+07	1.92175e+07	C02421	--
XMW0151	204.188	C15H24	1527.62	1469	Epizonarene	Terpenoids	41702-63-0	78.8	2.12561e+06	1.73362e+06	2.04137e+06	1.11139e+06	1.32914e+06	926720	1.45605e+06	1.93213e+06	1.58093e+06	--	--
KMW0176	126.104	C8H14O	985.26	986	5-Hepten-2-one, 6-methyl-	Ketone	110-93-0	89.1	1149243	1104129	1049084	1052009	1869722	839753	710395	1400409	953966	C07287	--
XMW0017	270.256	C17H34O2	1923.56	1926	Hexadecanoic acid, methyl ester	Ester	112-39-0	92.7	1.15422e+06	729509	1.18423e+06	1.05023e+06	866806	753197	1.84219e+06	1.5642e+06	1.12912e+06	C16995	--
XMW3619	78.022	C4H2N2	963.39	917	Fumaronitrile	Nitrogen compounds	764-42-1	61.7	1.45485e+06	1.43932e+06	1.44605e+06	1.03544e+06	965627	606333	834615	1.31752e+06	880387	--	--
XMW1528	220.183	C15H24O	1710.53	1743	(E,E)-3-[3,5-decadienyl]-Cyclopentanone	Ketone	1000131-99-7	77.7	128269	75234.1	92780	1.02445e+06	715807	874700	616228	592781	524144	--	--
XMW1172	164.047	C9H8O3	1393.83	1378	3,6-Dimethyl-4H-furo[3,2-c]pyran-4-one	Heterocyclic Compound	36745-38-7	61.0	192986	161596	138415	939584	707253	652114	452484	477946	408470	--	--
NMW0247	218.167	C15H22O	1569.19	1574	Furan, 3-(4,8-dimethyl-3,7-nonadienyl)-, (E)-	Terpenoids	23262-34-2	85.1	179166	110594	141195	920232	901078	834675	612807	709413	502455	C16779	--
KMW0390	172.146	C10H20O2	1194.33	1198	Octanoic acid, ethyl ester	Ester	106-32-1	88.4	1.31605e+06	1.41861e+06	1.382e+06	896282	1.53676e+06	1.07028e+06	1.21656e+06	1.70985e+06	1.14208e+06	C12292	--
XMW2049	184.146	C11H20O2	1327.41	-	Hexyl (E)-2-methylbut-2-enoate	Ester	1000373-74-3	93.5	2.37793e+06	2.21107e+06	2.35629e+06	861262	1.05957e+06	803375	1.78595e+06	2.09697e+06	1.66178e+06	--	--
KMW0439	154.136	C10H18O	1225.69	1233	2,6-Octadien-1-ol, 3,7-dimethyl-, (Z)-	Alcohol	106-25-2	88.8	954435	857563	657371	858231	843679	767464	916454	1.07263e+06	851071	C09871	--
XMW2395	110.048	C5H6N2O	962.5	975	6-methyl-3(2H)-Pyridazinone	Heterocyclic compound	13327-27-0	67.1	1.84981e+06	1.69715e+06	1.64209e+06	854661	1.3291e+06	452814	1.27578e+06	1.92111e+06	1.66424e+06	--	--
XMW1996	320.199	C19H28O4	1956.87	2134	Phthalic acid, butyl hept-4-yl ester	Ester	1000356-78-4	86.5	725006	431987	577917	837256	576240	746481	896992	1.12826e+06	777073	--	--
XMW2650	117.058	C8H7N	1295.52	-	1-isocyano-3-methyl-Benzene	Nitrogen compounds	20600-54-8	72.8	312498	231299	206506	827210	628628	862680	584714	467771	396007	--	--
XMW1368	270.256	C17H34O2	1890.74	1894	Pentadecanoic acid, ethyl ester	Ester	41114-00-5	92.3	1.27625e+06	964641	1.46052e+06	812367	596457	665327	1.39595e+06	1.3589e+06	1.1611e+06	--	--
XMW1371	298.287	C19H38O2	2090.12	2094	Heptadecanoic acid, ethyl ester	Ester	14010-23-2	90.1	1.22584e+06	781293	1.24891e+06	805147	571324	630387	1.35281e+06	1.28663e+06	1.12653e+06	--	--
ZMW0007	408.47	C29H60	2898.86	2900	Nonacosane	Hydrocarbons	630-03-5	97.0	731048	480053	457946	793831	467294	828517	999213	966308	547935	C08384	--
XMW0382	204.188	C15H24	1444.9	1419	isoledene	Terpenoids	95910-36-4	76.9	981715	779498	911945	771465	935088	692501	888457	1.06897e+06	899961	--	--
XMW2488	95.073	C6H9N	911.94	950	3-ethyl-1H-Pyrrole	Heterocyclic compound	1551-16-2	60.0	237456	269001	250426	767650	761285	928715	333146	361649	330014	--	--
XMW0614	186.162	C11H22O2	1293	1296	Nonanoic acid, ethyl ester	Ester	123-29-5	96.4	2.29076e+06	2.77253e+06	2.47932e+06	761387	1.18353e+06	1.02284e+06	2.1423e+06	2.43347e+06	1.67682e+06	--	--
XMW2369	204.136	C10H20O4	1168.65	1366	2-(2-butoxyethoxy)-Ethanol,acetate	Ester	124-17-4	69.2	1.25847e+06	1.1579e+06	992871	726823	850503	735489	1.00439e+06	1.24872e+06	998001	--	--
XMW0192	136.125	C10H16	1087.38	919	(+)-4-Carene	Terpenoids	29050-33-7	95.5	759120	708530	737739	725215	972610	407639	520711	937254	776354	--	--
XMW0390	286.214	C16H30O4	1586.76	1605	2,2,4-Trimethyl-1,3-pentanediol diisobutyrate	Ester	6846-50-0	89.1	1.75433e+06	1.40274e+06	1.54102e+06	715910	414111	643827	1.31184e+06	1.38208e+06	1.194e+06	--	--
KMW0204	144.115	C8H16O2	1169.93	1014	Acetic acid, hexyl ester	Ester	142-92-7	60.3	1.24022e+06	1.14198e+06	976121	700860	835609	708526	945652	1.21176e+06	967089	--	--
KMW0673	222.198	C15H26O	1665.06	1676	.alpha.-Cadinol	Terpenoids	481-34-5	91.7	1.15485e+06	751556	772671	687700	600920	650878	1.1826e+06	1.05108e+06	832476	--	--
WMW0149	222.198	C15H26O	1668.17	1598	Cedrol	Terpenoids	77-53-2	71.5	1.07626e+06	736372	754524	669050	611164	643009	1.17375e+06	1.01349e+06	793433	C09631	--
WMW0004	204.188	C15H24	1374.34	1221	Ylangene	Terpenoids	14912-44-8	97.0	1.72812e+06	1.38321e+06	1.81026e+06	574774	768702	470930	1.00392e+06	1.3987e+06	1.16447e+06	C09749	--
KMW0552	204.188	C15H24	1389.33	1417	(-)-.beta.-Bourbonene	Terpenoids	5208-59-3	89.3	2.16158e+06	1.71293e+06	2.99478e+06	566107	976867	826223	1.68037e+06	2.0732e+06	1.36469e+06	--	--
XMW0383	204.188	C15H24	1461.75	1472	1,4,7,-Cycloundecatriene, 1,5,9,9-tetramethyl-, Z,Z,Z-	Hydrocarbons	1000062-61-9	71.6	1.19196e+06	1.00118e+06	1.21609e+06	499734	590658	494620	804893	978952	706100	--	--
KMW0060	92.063	C7H8	764.27	773	Toluene	Aromatics	108-88-3	89.8	271556	1.2793e+06	1.17706e+06	497563	1.02751e+06	87517.8	303192	758970	576012	C01455	ko01100
WMW0010	204.188	C15H24	1392.75	1398	beta-Elemen	Terpenoids	515-13-9	67.8	729560	539697	792828	496982	516101	466554	709764	748724	577156	C17094	--
XMW1682	162.079	C9H10N2O	1386.11	1640	p-Vinylbenzohydrazide	Nitrogen compounds	1000244-74-9	82.6	539697	417017	612089	491786	500524	461897	524358	602150	449469	--	--
D201	310.287	C20H38O2	2182.22	2173	Ethyl Oleate	Ester	111-62-6	91.5	944107	630325	887225	490007	353828	427657	916477	875340	775360	C03425	--
XMW0126	134.11	C10H14	1026.04	1042	Benzene, 1-methyl-3-(1-methylethyl)-	Aromatics	535-77-3	92.0	438827	513244	447114	482591	657744	265141	576123	628095	512943	--	--
XMW0392	200.157	C15H20	1622.78	1599	.alpha.-Corocalene	Terpenoids	20129-39-9	80.0	958039	909445	931814	477483	587482	384434	622694	877935	752821	--	--
KMW0284	122.073	C8H10O	762.65	1116	Phenylethyl Alcohol	Alcohol	60-12-8	71.2	246757	1.24977e+06	1.13003e+06	470736	1.0181e+06	80661.3	288672	919829	558577	C05853	ko00360
NMW0227	204.188	C15H24	1514.26	1515	(Z)-1-Methyl-4-(6-methylhept-5-en-2-ylidene)cyclohex-1-ene	Terpenoids	13062-00-5	89.7	24443.2	17774.4	19996.4	461998	390054	398760	157367	209097	172439	C16814	ko00909
XMW3693	182.131	C11H18O2	1381.54	1282	(Z)-(Z)-Hex-3-en-1-yl 2-methylbut-2-enoate	Ester	84060-80-0	64.8	1.20777e+06	896217	770700	460375	546433	407148	764273	911962	732430	--	--
XMW1416	282.256	C18H34O2	2376.6	1986	Dodecanoic acid, hex-3-enyl ester	Ester	1000159-94-3	70.9	178469	101442	138592	457358	317521	308759	310196	363231	297075	--	--
XMW1238	168.115	C10H16O2	1238.05	1153	3-Methyl-2-butenoic acid, 3-methylbut-2-enyl ester	Ester	1000299-30-9	88.0	515226	550826	587310	431401	575907	368792	519169	653511	466056	--	--
KMW0282	142.136	C9H18O	1104.54	1104	Nonanal	Aldehyde	124-19-6	93.3	1.10206e+06	1.1288e+06	1.15012e+06	425303	837673	496260	870222	1.20893e+06	945838	--	--
XMW0547	204.188	C15H24	1369.47	1450	(-)-1,2,2.alpha.,3,3,4,6,7,8,8.alpha.-decahydro-2.alpha.,7,8-trimethylacenaphthylene	Terpenoids	1000365-86-7	67.2	59221.3	33061.7	94493.1	406421	623234	864515	211037	221523	266872	--	--
XMW3067	136.125	C10H16	1128.28	1292	1,3,5,5-tetramethyl-1,3-Cyclohexadiene	Hydrocarbons	4724-89-4	91.4	304965	374090	365954	373665	532033	165642	169289	399812	368685	--	--
WMW0051	192.151	C13H20O	1614.04	1491	β-Ionone	Terpenoids	14901-07-6	81.6	564763	481155	531044	366372	323742	343017	518134	537072	491813	--	--
XMW1410	204.188	C15H24	1425.87	1475	Cycloheptane, 4-methylene-1-methyl-2-(2-methyl-1-propen-1-yl)-1-vinyl-	Terpenoids	1000159-38-5	74.7	809749	541719	748018	353569	407586	333833	586227	721264	468624	--	--
KMW0642	226.266	C16H34	1599.03	1600	Hexadecane	Hydrocarbons	544-76-3	92.0	589851	520870	629151	352397	387492	339758	522866	600925	459023	--	--
KMW0514	178.099	C11H14O2	1347.66	1351	Benzenepropanoic acid, ethyl ester	Ester	2021-28-5	84.9	97135.9	63755.8	88915.8	351298	353845	377051	251725	279217	216708	--	--
WMW0062	142.136	C9H18O	1153.19	1156	3-Nonen-1-ol, (Z)-	Alcohol	10340-23-5	85.0	381598	324527	303215	332820	427139	309158	367085	461757	406688	--	--
KMW0542	200.178	C12H24O2	1392.16	1398	Decanoic acid, ethyl ester	Ester	110-38-3	80.5	833919	874568	974917	331820	379373	389781	741981	835081	640662	--	--
XMW1401	184.146	C11H20O2	1229.15	1237	n-Valeric acid cis-3-hexenyl ester	Ester	35852-46-1	84.2	368157	344739	317673	325571	613894	292082	413030	538924	353655	--	--
KMW0551	198.235	C14H30	1399.37	1400	Tetradecane	Hydrocarbons	629-59-4	81.7	706259	561960	618244	323534	503881	401188	549129	640439	453580	--	--
D281	246.198	C17H26O	2037	1827	Avocadynofuran	Heterocyclic compound	24708-33-6	71.4	432919	206909	312368	320921	184330	245634	431818	427331	333141	--	--
ZMW0002	338.391	C24H50	2498.8	2400	Tetracosane	Hydrocarbons	646-31-1	94.4	565683	514250	501247	315279	236295	195364	396817	450368	447886	--	--
KMW0259	136.125	C10H16	1059.87	1060	.gamma.-Terpinene	Terpenoids	99-85-4	87.3	318558	349260	303708	310492	439839	162851	199374	383348	316878	C09900	--
XMW2308	142.136	C9H18O	1153.98	1222	Cyclohexanepropanol	Alcohol	1124-63-6	76.3	320201	276944	244412	297034	339564	314196	312190	402228	317983	--	--
ZMW0008	422.485	C30H62	2699.09	3000	Triacontane	Hydrocarbons	638-68-6	94.3	355221	262717	294465	296704	176069	301499	411972	348229	273876	--	--
D267	382.381	C25H50O2	2726.87	2728	Tetracosanoic acid, methyl ester	Ester	2442-49-1	87.8	210084	125234	171163	278380	129023	264688	287822	271604	178300	--	--
WMW0053	204.188	C15H24	1388.22	1448	Benzene, 1-(1,5-dimethylhexyl)-4-methyl-	Terpenoids	1461-02-5	67.8	902356	644847	955705	273656	366592	267415	624763	769367	566537	--	--
XMW1127	158.131	C9H18O2	1071.03	1114	Formic acid, octyl ester	Ester	112-32-3	96.5	1.05781e+06	1.05726e+06	914190	258715	334427	200031	566685	807589	621944	--	--
KMW0689	212.084	C14H12O2	1774.08	1723	Benzyl Benzoate	Ester	120-51-4	92.5	3.99396e+06	2.23745e+06	3.12081e+06	254858	160124	161962	2.38386e+06	2.18087e+06	2.02771e+06	C12537	--
XMW0836	222.198	C15H26O	1551.35	1559	3,7-Cyclodecadiene-1-methanol, .alpha.,.alpha.,4,8-tetramethyl-, [s-(Z,Z)]	Terpenoids	21657-90-9	77.7	48357.8	40670.9	37524.9	247660	214174	170398	144654	165399	138705	--	--
ZMW0001	324.376	C23H48	2298.43	2300	Tricosane	Hydrocarbons	638-67-5	95.5	384789	274237	367408	246657	180727	157094	334111	398639	365427	C17433	--
XMW0627	222.089	C12H14O4	1585.52	1594	Diethyl Phthalate	Ester	84-66-2	73.4	253422	180640	152478	239826	149583	152190	189068	208267	213362	C14175	--
XMW0296	172.146	C10H20O2	1072.24	1183	Acetic acid, octyl ester	Ester	112-14-1	81.7	985794	1.0109e+06	881932	237532	295699	147452	438096	748705	577406	--	--
XMW0139	198.141	C15H18	1680.83	1706	6-Isopropyl-1,4-dimethylnaphthalene	Terpenoids	489-77-0	85.6	457250	499698	430279	231571	287902	184526	323888	436329	385545	--	--
KMW0191	144.115	C8H16O2	998.43	999	Hexanoic acid, ethyl ester	Ester	123-66-0	84.2	874363	1.01032e+06	930243	229192	770512	269134	409038	812545	401132	--	--
KMW0604	204.188	C15H24	1336.64	1517	(1S,2E,6E,10R)-3,7,11,11-Tetramethylbicyclo[8.1.0]undeca-2,6-diene	Terpenoids	24703-35-3	91.9	554116	384914	575050	223607	281938	221169	425616	494501	388249	--	--
KMW0434	152.12	C10H16O	1221.77	1250	2,6,6-trimethyl-1-Cyclohexene-1-carboxaldehyde	Terpenoids	432-25-7	77.8	486271	428281	424060	220615	236506	196847	270943	386855	267900	C20425	--
XMW0893	96.014	C2H6FOP	699.16	-	Dimethylphosphinic fluoride	Halogenated hydrocarbons	753-70-8	87.0	373861	405340	1.02743e+06	217524	399214	9	178113	329380	205956	--	--
XMW3570	236.16	C15H24S	1752.48	1744	(1S,3aR,4R,8R,8aS)-1-Isopropyl-3a-methyl-7-methylenedecahydro-4,8-epithioazulene	Sulfur compounds	72445-42-2	79.0	705142	588402	621853	216920	271317	236359	690108	692486	612500	--	--
XMW2288	144.151	C9H20O	1173.27	1094	(S)-(+)-6-Methyl-1-octanol	Alcohol	110453-78-6	78.7	41486.6	47661.6	67227.2	210374	222164	171461	186962	113213	71341.5	--	--
NMW0149	168.115	C10H16O2	1346.4	1355	Geranic acid	Terpenoids	459-80-3	73.4	41355.6	26003.7	14392.3	204515	140000	190084	173370	133381	61506.2	C16461	ko01110
XMW3736	222.162	C14H22O2	1653.43	-	5,6,6-trimethyl-Undeca-3,4-diene-2,10-dione	Ketone	90165-10-9	65.2	468767	333213	341667	204433	206831	226163	448241	397540	321866	--	--
XMW1671	204.188	C15H24	1429.57	1348	9-Methyltetracyclo[7.3.1.0(2.7).1(7.11)]tetradecane	Hydrocarbons	1000215-30-5	82.3	703675	542914	740750	201953	248277	190619	451262	543272	450728	--	--
XMW0295	132.094	C10H12	1092.08	1073	Benzene, 1-methyl-3-(1-methylethenyl)-	Aromatics	1124-20-5	88.4	145330	152987	137690	173290	207028	112012	150336	194763	163350	--	--
NMW0652	410.391	C30H50	2815.79	2832	Squalene	Terpenoids	111-02-4	87.2	21961	9207.2	13723	168845	52791	80876	103806	140623	87391	C00751	ko00100,ko00909,ko01100,ko01110
XMW0047	150.104	C10H14O	1318.44	1248	Phenol, 2-(1-methylpropyl)-	Phenol	89-72-5	69.5	118152	100350	84143.9	168785	133896	142762	129474	141599	109236	C14138	--
XMW1084	168.115	C10H16O2	1233.7	1199	2-Butenoic acid, 3-hexenyl ester, (E,Z)-	Ester	65405-80-3	95.2	106145	96264.7	76514.9	164052	234102	141337	145376	182593	120489	--	--
KMW0692	268.277	C18H36O	1842.3	1770	2-Pentadecanone, 6,10,14-trimethyl-	Ketone	502-69-2	92.2	155672	129284	149055	163861	150644	172284	225126	227923	183447	--	--
GMW0178	172.146	C10H20O2	1847.98	1295	Octanal, 7-hydroxy-3,7-dimethyl-	Terpenoids	107-75-5	61.8	158697	130763	152751	163846	152404	172934	230681	233640	184376	--	--
KMW0431	134.084	C8H10N2	1165.4	1248	5H-5-Methyl-6,7-dihydrocyclopentapyrazine	Heterocyclic compound	23747-48-0	75.2	63502	57015	62384	163761	199747	105065	108412	126056	113072	--	--
KMW0304	134.11	C10H14	1131.03	1115	1,3,8-p-Menthatriene	Terpenoids	18368-95-1	87.8	96352.5	101704	93436.9	162249	180183	152637	118707	112669	133842	--	--
XMW1486	264.209	C17H28O2	1412.95	1727	5-Azulenemethanol, 1,2,3,4,5,6,7,8-octahydro-.alpha.,.alpha.,3,8-tetramethyl-, acetate, [3S-(3.alpha.,5.alpha.,8.alpha.)]-	Ester	134-28-1	79.6	88771.6	72182.8	83714.9	159158	160151	141404	128442	159673	123284	--	--
XMW1166	204.061	C12H12OS	1566.97	1697	2-Acetyl-3,5-dimethylbenzo(b)thiophene	Heterocyclic compound	6179-05-1	67.3	78127	76653	67135	153621	110165	234841	183358	130623	85120.3	--	--
KMW0590	204.188	C15H24	1328.51	1490	Naphthalene, 1,2,3,5,6,7,8,8a-octahydro-1,8a-dimethyl-7-(1-methylethenyl)-, [1R-(1.alpha.,7.beta.,8a.alpha.)]-	Terpenoids	4630-07-3	82.6	487506	353673	478277	152594	197271	134832	308525	391879	303687	C17277	ko00909
KMW0338	140.12	C9H16O	1159.95	1162	2-Nonenal, (E)-	Aldehyde	18829-56-6	96.2	216816	212811	213194	151723	257393	173319	293680	296557	304989	--	--
XMW1905	192.042	C10H8O4	1533.43	1353	Fumaric acid, dipropargyl ester	Ester	1000330-54-0	65.1	196698	166705	198041	149900	126116	118168	144591	181407	154002	--	--
XMW1488	329.233	C19H30F3N	1538.7	1884	3-TrifluoromethylbenzylAmine, N-decyl-N-methyl-	Amine	1000310-29-2	77.0	186646	162692	188739	149623	129064	137645	188699	209064	179006	--	--
KMW0683	240.282	C17H36	1699.08	1700	Heptadecane	Hydrocarbons	629-78-7	86.7	309510	257151	298891	149237	169935	127286	277855	305151	249713	C01816	--
XMW1076	170.131	C10H18O2	1186.27	1191	4-Octenoic acid, ethyl ether	Ester	1000132-45-5	82.8	77832	73810	72944	147588	294603	152714	82167	141516	85859	--	--
XMW0084	136.125	C10H16	1140.8	993	2,4,6-Octatriene, 2,6-dimethyl-	Terpenoids	673-84-7	82.3	110120	133724	132173	146158	193464	52620.5	62673	147720	143456	--	--
XMW1353	268.24	C17H32O2	1875.29	1865	(Z)-Ethyl pentadec-9-enoate	Ester	56219-09-1	93.0	152315	99196	167180	145607	98624	103475	193423	187685	152040	--	--
KMW0566	204.188	C15H24	1403.88	1455	(4aR-trans)-decahydro-4a-methyl-1-methylene-7-(1-methylethylidene)-Naphthalene	Terpenoids	515-17-3	88.6	523336	400709	555666	145337	183679	124592	333933	424842	349423	C21707	--
NMW0041	150.141	C11H18	1113.11	1116	(E)-4,8-Dimethylnona-1,3,7-triene	Hydrocarbons	19945-61-0	90.7	311090	261003	331513	145260	270030	133027	239818	357714	241571	C21795	--
XMW0474	204.115	C13H16O2	1572.26	1565	3-Hexen-1-ol benzoate	Ester	1000132-06-6	90.3	3.31608e+06	2.39282e+06	2.41051e+06	139749	97635.8	102312	2.02311e+06	1.97209e+06	1.82853e+06	--	--
XMW1931	168.151	C11H20O	1280.7	1161	(2E)-1-Methoxy-3,7-dimethylocta-2,6-diene	Ether	1000333-79-3	81.3	268758	207830	250087	135961	139585	97477.4	191952	271802	184214	--	--
XMW0471	204.115	C13H16O2	1575.21	1565	3-Hexen-1-ol, benzoate, (Z)-	Ester	25152-85-6	94.5	3.25825e+06	2.36378e+06	2.39246e+06	133713	96194.3	96038.5	1.98021e+06	1.92943e+06	1.80067e+06	--	--
KMW0488	184.219	C13H28	1299.48	1300	Tridecane	Hydrocarbons	629-50-5	77.7	248912	200824	217820	133194	244147	151204	181736	261553	157612	C13834	--
KMW0699	254.297	C18H38	1799.04	1800	Octadecane	Hydrocarbons	593-45-3	88.9	176750	150937	166615	127281	115104	100421	176684	193316	152303	--	--
KMW0557	166.063	C9H10O3	1270.29	1270	Benzoic acid, 2-hydroxy-, ethyl ester	Ester	118-61-6	85.3	497985	404200	427021	125149	137238	79078	333795	377176	321718	--	--
XMW0513	292.24	C19H32O2	2098.05	2098	9,12,15-Octadecatrienoic acid, methyl ester, (Z,Z,Z)-	Ester	301-00-8	90.7	131710	73731.6	152296	117874	98138.8	70576.1	277161	219165	167059	--	--
NMW0005	154.136	C10H18O	1183.79	1182	3-Cyclohexen-1-ol, 4-methyl-1-(1-methylethyl)-, (R)-	Terpenoids	20126-76-5	76.1	130273	87369	78070.6	114913	181149	101693	147803	171128	104383	C17073	--
XMW1992	184.146	C11H20O2	1426.45	1270	3-Methylbut-2-enoic acid, 2-methylpentyl ester	Ester	1000355-12-8	70.2	133422	111017	120938	111364	103092	81130	116485	140574	117704	--	--
XMW3008	220.183	C15H24O	1803.46	1666	Ylangenol	Terpenoids	41610-69-9	77.3	166343	110715	124599	108948	84789.8	17722.3	133576	110385	149360	--	--
XMW1554	164.157	C12H20	1145.67	1152	1,4-diethyl-1,4-dimethyl-2,5-Cyclohexadiene	Hydrocarbons	1000150-21-6	76.6	152672	140019	173013	108844	137569	80295	113835	165620	151543	--	--
XMW1095	190.172	C14H22	1363.48	1558	Benzene, 1,2-diethyl-3,4,5,6-tetramethyl-	Aromatics	33884-69-4	68.3	121611	126953	119095	107528	113999	73758.3	76887.7	118186	127400	--	--
XMW0307	106.078	C8H10	871.21	865	p-Xylene	Aromatics	106-42-3	74.8	390141	533345	424399	106590	253219	96029.9	159937	332639	210433	C06756	ko01100
KMW0404	128.063	C10H8	1189.59	1182	Naphthalene	Aromatics	91-20-3	77.8	229541	209561	187049	104973	127052	108841	197111	255824	173407	C00829	ko01100
XMW1011	220.183	C15H24O	1766.06	1631	Ledene oxide-(II)	Heterocyclic compound	1000159-36-7	71.3	69766.6	58646.8	65217.9	103753	78633.4	72196.7	91922.3	90152.3	79808	--	--
XMW2490	142.099	C8H14O2	1043.3	1037	2-Hexenoic acid, ethyl ester	Ester	1552-67-6	81.4	101285	127134	109757	102297	215422	81145.7	71182.3	146231	100419	--	--
KMW0406	170.203	C12H26	1199.86	1200	Dodecane	Hydrocarbons	112-40-3	85.1	247385	207682	221711	99977.9	221788	144004	176240	262637	155853	C08374	--
KMW0113	114.104	C7H14O	889.96	895	2-Heptanone	Ketone	110-43-0	74.7	255457	249852	291693	98549.2	146588	42813.1	78423.3	215308	211346	C08380	--
XMW1372	296.272	C19H36O2	2068.15	2071	(Z)-Ethyl heptadec-9-enoate	Ester	1089325-29-0	93.1	199864	113454	169491	93821	71964	74954	213916	201336	171652	--	--
KMW0716	298.287	C19H38O2	2020.93	2010	Isopropyl palmitate	Ester	142-91-6	78.9	42143.1	25678.4	38841.9	92759.9	64717.4	71942.1	76792.3	75405.3	56229.5	--	--
KMW0461	158.131	C9H18O2	1264.92	1275	Nonanoic Acid	Acid	112-05-0	66.7	38732	39518	21734.9	92273.2	93331.2	100524	112880	98982.6	67807.1	--	--
XMW0993	200.131	C13H16N2	1538.22	1694	Pyrimido[1,6-a]indole, 1,2,3,4-tetrahydro-2,5-dimethyl-	Heterocyclic compound	22106-07-6	67.5	196234	194060	197870	91815.9	116266	72813.4	130469	176336	154170	--	--
KMW0399	156.151	C10H20O	1205.56	1209	Decanal	Aldehyde	112-31-2	95.3	159441	150200	151821	88685.9	141825	95262.7	138873	188582	136373	C12307	--
XMW0667	254.225	C16H30O2	1780.32	1787	Ethyl 9-tetradecenoate	Ester	1000336-60-8	68.7	142984	91062.8	132371	87366.8	68951.3	55144.5	105323	96176.5	112294	--	--
XMW0438	136.089	C9H12O	999.17	1048	Furan, 2-(1-pentenyl)-, (E)-	Heterocyclic compound	20992-69-2	75.1	160639	155530	144425	84293.4	128044	87556.1	94507	145334	103075	--	--
XMW0852	261.061	C11H10F3NO3	1545.44	1548	l-Alanine, N-(2,3,4-trifluorobenzoyl)-, methyl ester	Ester	1000299-62-7	82.6	175491	140357	174011	78023.7	82078.5	77141.6	168872	158146	142195	--	--
KMW0697	240.245	C16H32O	1817.45	1813	Hexadecanal	Aldehyde	629-80-1	92.3	84212	59234.4	75952.6	75135.6	58029.6	61781.5	82591.1	93434.6	91170.3	C00517	ko00071
XMW2847	174.141	C13H18	1257.82	1454	1,2,3,4-tetrahydro-1,6,8-trimethyl-Naphthalene	Aromatics	30316-36-0	68.5	31617.5	23417.9	31244.5	74517.1	65568.1	63079.7	46086	53131.9	49412.1	--	--
XMW2985	220.219	C16H28	1609.69	1425	1,3-di-n-Propyladamantane	Hydrocarbons	40002-47-9	62.4	174582	144537	171573	72453.4	63037.4	73381.5	152714	148715	133147	--	--
XMW3530	165.115	C10H15NO	1298.54	1469	dl-2-benzylamino-1-Propanol	Alcohol	6940-81-4	60.3	69733.7	67059.3	65451.6	72062.7	72575.1	49951.2	62308.5	77922	77148.2	--	--
XMW2810	226.266	C16H34	1570.01	1570	3-methyl-Pentadecane	Hydrocarbons	2882-96-4	61.6	71661.7	65111.6	79135.7	72059.7	74363.4	70928.5	78792	94887.7	71370.3	--	--
XMW2569	224.25	C16H32	1767.23	1656	decyl-Cyclohexane	Hydrocarbons	1795-16-0	67.3	71674.8	56062.2	67848.7	70950.9	57681.8	57162.9	72259.2	82334	67911	--	--
XMW3377	278.297	C20H38	1919.52	2027	3-Eicosyne	Hydrocarbons	61886-66-6	60.6	81227	51081	71421	68167	59304	56261	88851.5	92931.9	70314	--	--
XMW3578	268.277	C18H36O	1674.91	1900	hexadecyl-Oxirane	Hydrocarbons	7390-81-0	76.7	77058	64303	76602	64282	56150	53377	80462	95740	72227	--	--
XMW0349	218.167	C15H22O	1789.42	1587	Isolongifolen-5-one	Terpenoids	1000159-37-1	66.5	110834	87748.5	90098.7	62449.7	68977.4	63200.1	114469	123500	87603.6	--	--
XMW3154	117.058	C8H7N	1139.15	1108	2-methyl-Benzonitrile	Nitrogen compounds	529-19-1	94.5	1.19101e+06	918763	797022	60275.1	48002.7	56968	749141	761043	664451	--	--
KMW0316	154.136	C10H18O	1110.98	1134	(2R,4R)-4-Methyl-2-(2-methylprop-1-en-1-yl)tetrahydro-2H-pyran	Terpenoids	5258-11-7	78.8	164487	181633	148884	58693.6	83653.3	74242.5	111120	143263	129260	--	--
XMW0664	166.063	C9H10O3	1589.68	1650	BenzAldehyde, 2,4-dihydroxy-3,6-dimethyl-	Aldehyde	34883-14-2	64.0	63842.8	45149.7	48372.9	56678.8	36555.6	58521.9	60424.1	61212.1	54068.4	--	--
XMW2967	168.137	C8H16N4	1273.54	1451	tetrahydro-1H,5H,7H,11H-Dipyrazolo[1,2-a:1',2'-d][1,2,4,5]tetrazine	Heterocyclic compound	37882-92-1	62.1	125394	123137	112123	55712.2	57944	55982.3	90177.7	117424	95365.3	--	--
XMW1781	277.035	C14H6F3NO2	1803.43	1897	2,3,4-Trifluorobenzoic acid, 4-cyanophenyl ester	Ester	1000308-03-4	63.7	107242	84546	80733	55540	44167	18087	64000	39627.6	68334.1	--	--
KMW0485	214.193	C13H26O2	1491.93	1307	Undecanoic acid, ethyl ester	Ester	627-90-7	61.7	121055	120240	151884	54986.8	64111.4	51658.9	132033	134160	102310	--	--
KMW0472	117.058	C8H7N	1140.43	1292	Indole	Heterocyclic compound	120-72-9	86.0	1.1522e+06	880397	771948	54705.1	47018.3	45909.7	716596	722892	638356	C00463	ko00380,ko00400,ko00402,ko01100,ko01110
XMW0060	200.157	C15H20	1604.89	1601	.alpha.-Dehydro-ar-himachalene	Terpenoids	78204-62-3	71.9	102329	95397.1	99816.5	53409.8	59606.7	41572	65573.3	83672.6	76850.5	--	--
XMW3687	212.12	C15H16O	1897.79	1662	1-Acetyl-4,6,8-trimethylazulene	Ketone	834-97-9	73.3	54308	46637	45075	52610	45959	42537	65633.8	63629	59245	--	--
XMW2857	210.141	C16H18	1680.53	1663	2,2',5,5'-tetramethyl-1,1'-Biphenyl	Aromatics	3075-84-1	62.8	61231	40013	58076	52031	30569	39429	54177	57508	51965	--	--
KMW0302	154.136	C10H18O	1110.86	1117	(2S,4R)-4-Methyl-2-(2-methylprop-1-en-1-yl)tetrahydro-2H-pyran	Terpenoids	3033-23-6	71.3	135878	128821	146266	51275.7	94838.1	44521.1	106220	137363	125177	--	--
XMW3193	352.163	C16H33I	1746.08	2038	1-iodo-Hexadecane	Halogenated hydrocarbons	544-77-4	61.7	80557.6	75993.4	78931.4	50446	51892.8	38654.4	62347.4	70625.9	65243.4	--	--
XMW0871	228.079	C14H12O3	1880.36	1869	Benzoic acid, 2-hydroxy-, phenylmethyl ester	Ester	118-58-1	84.6	791947	398744	512853	50032.9	15786	15786	734156	611792	462412	--	--
XMW1017	220.219	C16H28	1314.44	1618	1,E-11,Z-13-Hexadecatriene	Hydrocarbons	80634-97-5	63.5	105783	99920.5	98606.7	49957.5	65335.3	43357	91502	107807	81497	--	--
XMW1721	388.24	C19H33F5O2	1661.98	1709	Pentafluoropropionic acid, 4-hexadecyl ester	Ester	1000283-04-1	65.3	36988.6	35144.9	33334.5	49313.9	42144.2	54006.7	43915.2	46406	39166.6	--	--
XMW1102	174.068	C11H10O2	1277.17	1357	Vinyl trans-cinnamate	Ester	17719-70-9	84.7	116439	98240.5	80403.7	48505.2	40444.6	47204.7	112418	107856	87405.5	--	--
XMW0230	268.313	C19H40	1806.22	1653	Pentadecane, 2,6,10,14-tetramethyl-	Hydrocarbons	1921-70-6	69.8	75521.8	66643	71231.6	46854	38326	32554.8	70235	76792.8	64826.4	--	--
XMW3068	166.136	C11H18O	1258.34	1254	2,6,6-trimethyl-1-Cyclohexene-1-acetAldehyde	Aldehyde	472-66-2	74.6	126979	111280	111532	46727.9	58316.7	41718	78961.6	99636.5	85689.3	--	--
NMW0492	290.261	C20H34O	2304.68	2201	trans-Geranylgeraniol	Terpenoids	24034-73-9	76.2	17420	9106	10233	41951	34587	26623	35065	57396	38883	C09094	ko00904,ko01110
XMW0366	134.11	C10H14	1121.99	1133	Benzene, 1,2,3,5-tetramethyl-	Aromatics	527-53-7	67.9	45293.3	42748.3	39109.2	41388.3	53147.8	48548.5	42979.5	56003.4	41740	--	--
XMW0662	142.078	C11H10	1316.29	1298	Naphthalene, 2-methyl-	Aromatics	91-57-6	85.1	107839	102320	97684.4	41337.3	38053.9	44312.6	83863.6	91700.3	78266	C14098	--
XMW0555	160.052	C10H8O2	1568.1	1343	2-Acetylbenzofuran	Heterocyclic compound	1646-26-0	73.7	67968	67828	69945	40934	47946	29815	45372	64374	59560	--	--
XMW3683	174.104	C12H14O	1359.51	1294	4-(1,1-dimethyl-2-propynyloxy)-Toluene	Aromatics	82719-54-8	70.0	69805	68303	67379.2	39679.1	45979.1	33472.1	38823.4	59964	57232.8	--	--
XMW3330	272.25	C20H32	2028.19	1989	Kaur-15-ene	Terpenoids	5947-50-2	83.3	55172	21424	33030	38867	20390	38722	81805	61757	38746	--	--
XMW3123	242.225	C15H30O2	1724.21	1686	12-methyl-Tridecanoic acid,methyl ester	Ester	5129-58-8	66.0	49098.9	32473	47115.1	38693.4	31396.5	31017.8	69204.7	63182.6	43798.5	--	--
KMW0545	184.183	C12H24O	1408.34	1409	Dodecanal	Aldehyde	112-54-9	64.3	128046	85538.9	124456	37441.7	53968.6	35055.2	80972	108605	81086.8	C02278	--
XMW2751	198.235	C14H30	1460.66	1348	5-methyl-Tridecane	Hydrocarbons	25117-31-1	67.3	60472.4	62460.2	75348.8	35592.7	47343.8	32932.5	73436.2	82161.9	61638.3	--	--
XMW1365	268.24	C17H32O2	1771.17	1886	cis-9-Tetradecenoic acid, propyl ester	Ester	1000405-14-2	70.1	82561.3	82332.4	104545	34594.7	25845.2	32752.9	81713.3	84848.4	70087.2	--	--
XMW0763	272.25	C20H32	2082.74	2041	(4aR,6aS,9R,11aR,11bR)-4,4,11b-trimethyl-8-methylenetetradecahydro-6a,9-methanocyclohepta[a]naphthalene	Terpenoids	562-28-7	95.6	231019	126853	208070	34172	25741	24456	148777	136344	127289	C06090	ko00904,ko01100,ko01110
XMW2987	234.119	C13H18N2S	1761.7	2066	N-(2,6-Dimethylphenyl)-N-[(2E)-3-methyl-1,3-thiazinan-2-ylidene]amine	Heterocyclic compound	40202-12-8	78.3	43346.4	34015.2	32510.5	33962.5	20459	26768.5	37680.3	38655.9	31852.9	--	--
XMW0511	296.308	C20H40O	1879.58	2045	3,7,11,15-Tetramethyl-2-hexadecen-1-ol	Terpenoids	102608-53-7	86.2	44789.4	41049.1	69712.4	32604.3	24341.1	32556.3	49237.5	45084.6	38080.5	--	--
XMW3721	204.188	C15H24	1360.64	1490	Aciphyllene	Terpenoids	87745-31-1	84.3	356489	239432	341205	32171.8	50614.5	42360	190235	226063	154294	--	--
XMW3649	272.25	C20H32	1946.52	1994	(E,E,E)-3,7,11,15-Tetramethylhexadeca-1,3,6,10,14-pentaene	Hydrocarbons	77898-97-6	77.7	41328.6	32982.3	34818.4	30333.3	24342.1	24770.3	37591.6	44944.5	42680.5	--	--
XMW3696	214.099	C14H14O2	1877.58	1745	3,4'-dimethoxy-1,1'-Biphenyl	Aromatics	84591-12-8	69.5	39294.5	34888.4	33035.6	29581	26949.4	23194.9	40205.3	44217.7	39034.2	--	--
XMW2365	258.198	C18H26O	1850.85	1851	1,3,4,6,7,8-hexahydro-4,6,6,7,8,8-hexamethyl-Cyclopenta[g]-2-benzopyran	Heterocyclic compound	1222-05-5	70.5	28886	22930.7	22442.3	28723	19143.6	26987.4	30753.4	30744.4	26999	--	--
XMW2864	166.172	C12H22	1179.5	1236	decahydro-2,2-dimethyl-Naphthalene	Aromatics	31124-85-3	66.3	22866.2	30146.9	26730.3	27673.4	35756	18734.6	13233.8	18289.9	20164.7	--	--
KMW0724	298.287	C19H38O2	2124.32	2146	Methyl stearate	Ester	112-61-8	83.7	32347.3	19910.7	30605.9	26361.6	19738.5	17080.1	60163.5	48334.4	35501.2	--	--
XMW0963	158.11	C12H14	1275.93	1253	1H-Indene, 1,1,3-trimethyl-	Aromatics	2177-45-9	61.1	14945.3	10977.3	11789	26115.5	22054.8	19188.2	16335.6	18126.8	15838.7	--	--
XMW3645	166.063	C9H10O3	1293.36	1380	Ethyl 3-hydroxybenzoate	Ester	7781-98-8	80.4	271282	186014	213062	23667.1	17987.3	22757.4	123640	173612	106570	--	--
XMW0314	204.188	C15H24	1598.34	1431	Elemene isomer	Terpenoids	1000414-93-6	67.8	34548	25624	22377	22754	15489	22279	25936	27544	19843	--	--
XMW2189	126.024	C7H7Cl	1014.21	1023	Benzyl chloride	Halogenated hydrocarbons	100-44-7	71.2	67239.2	59337.1	68562.1	20921.5	28515.7	20009.9	41997.3	61256.8	44357	--	--
XMW0864	218.167	C15H22O	1748.94	1808	Neoisolongifolene, 8-oxo-	Terpenoids	1000152-03-3	64.4	29109.4	25449.5	25233.9	17437.1	19353.2	15103.6	27759.5	30745.2	23735.3	--	--
KMW0687	222.198	C15H26O	1582.22	1754	1H-Cycloprop[e]azulen-4-ol, decahydro-1,1,4,7-tetramethyl-, [1aR-(1a.alpha.,4.beta.,4a.beta.,7.alpha.,7a.beta.,7b.alpha.)]-	Terpenoids	552-02-3	64.4	28542.9	21693.2	17207.3	16675	8793.98	10931.8	26821.7	19391.2	19946.8	--	--
KMW0267	136.052	C8H8O2	1095.89	1103	Benzoic acid, methyl ester	Ester	93-58-3	84.4	905601	819591	766966	15524.7	13405.8	10680.1	615853	706794	513469	C20645	--
XMW1161	180.079	C10H12O3	1460.05	1697	4',6'-Dihydroxy-2',3'-dimethylacetophenone	Ketone	7743-14-8	60.6	14542	11893	12906	12770	8980	11133	17578	17085	14144	--	--
XMW0143	204.188	C15H24	1356.87	1403	1H-3a,7-Methanoazulene, 2,3,4,7,8,8a-hexahydro-3,6,8,8-tetramethyl-, [3R-(3.alpha.,3a.beta.,7.beta.,8a.alpha.)]-	Terpenoids	469-61-4	79.1	152158	98051.4	141660	11775.8	19840.5	12860.4	50592.2	65444.8	43314.8	C09630	--
KMW0483	170.167	C11H22O	1306.98	1307	Undecanal	Aldehyde	112-44-7	68.7	18182.6	19313.3	22787.7	9535.38	19415.7	9062.56	9999.9	21097.2	18748.2	--	--
XMW1539	283.132	C16H17N3O2	2353.12	2455	1-(bicyclo[3.2.1]oct-2-en-4-yl)-4-phenyl-1,2,4-Triazolidine-3,5-dione	Heterocyclic compound	1000142-36-0	60.2	15208.9	11798	13899	9301.73	9676.12	6763.85	16906.1	20755.5	15234.9	--	--
KMW0640	212.214	C14H28O	1307.39	1613	Tetradecanal	Aldehyde	124-25-4	71.7	28194.4	24968.6	32379.7	8596.37	23587.9	8673.94	19630.2	29324.4	23595.6	--	--
XMW0532	138.091	C6H10N4	1287.45	1096	1H-Pyrazole-1-carboximidamide, 3,5-dimethyl-	Heterocyclic compound	22906-75-8	67.0	23718.6	23264.9	25370.5	7899.66	19040.7	9692.22	23778.2	26530.6	20928	--	--
XMW0473	206.131	C13H18O2	1579.6	1557	Benzoic acid, hexyl ester	Ester	6789-88-4	81.5	462643	343767	349103	7579.05	6131.65	5693.63	304079	283336	252954	--	--
D279	396.397	C26H52O2	2791.91	2773	Ethyl tetracosanoate	Ester	24634-95-5	69.6	11748.1	9279.59	10549.6	5705.3	2571.23	2603.19	20264.6	17310.5	6795.02	--	--
XMW1312	355.158	C20H28CoN2	2257.68	-	Cobalt, bis(.eta.-5-piperidinylcyclopentadienyl)-	Heterocyclic compound	1000162-04-6	75.9	6766	6441	6318.99	3167	2253.33	687	8933.34	9107.84	6273.97	--	--
