# Supplementary material for: Integrated volatile metabolomic and transcriptomic analysis provides insights into the regulation of floral scents between two contrasting varieties of Lonicera japonica
Source: Front Plant Sci. 2022 Sep 12;13:989036. doi: 10.3389/fpls.2022.989036 (PMC9510994; doi:10.3389/fpls.2022.989036)
Supplement: Supplementary file 3 [file Table_3.XLSX]

## Sheet: Sheet1
Supplementary Table 3. Detailed information of differentially accumulated metabolites from Lonicera japonica flowers in ‘Yujin2’ compared to ‘Fengjin1’
Index	Formula	Compounds	Common name	Class I	CAS	Match factor	F1_V_1	F1_V_2	F1_V_3	Y2_V_1	Y2_V_2	Y2_V_3	VIP	p_value	FDR	Fold_Change	Log2FC	Type
KMW0503	C8H9NO2	Methyl anthranilate	Methyl anthranilate	Ester	134-20-3	93.2	61968.8	25402.9	31148.5	6.03968e+06	5.218e+06	7.00076e+06	1.22637	0.00715873	0.0341181	154.053	7.26729	up
NMW0227	C15H24	(Z)-1-Methyl-4-(6-methylhept-5-en-2-ylidene)cyclohex-1-ene	(Z)-gamma-bisabolene	Terpenoids	13062-00-5	89.7	24443.2	17774.4	19996.4	461998	390054	398760	1.23213	0.00307282	0.0255574	20.105	4.32948	up
NMW0310	C15H26O	2,6,10-Dodecatrien-1-ol, 3,7,11-trimethyl-	Farnesol	Terpenoids	4602-84-0	96.3	1.14931e+06	592078	759707	1.11778e+07	7.51569e+06	1.29296e+07	1.20598	0.0249211	0.0574167	12.6437	3.66035	up
XMW0547	C15H24	(-)-1,2,2.alpha.,3,3,4,6,7,8,8.alpha.-decahydro-2.alpha.,7,8-trimethylacenaphthylene		Terpenoids	1000365-86-7	67.2	59221.3	33061.7	94493.1	406421	623234	864515	1.16309	0.0477543	0.0872504	10.1414	3.34218	up
XMW1528	C15H24O	(E,E)-3-[3,5-decadienyl]-Cyclopentanone		Ketone	1000131-99-7	77.7	128269	75234.1	92780	1.02445e+06	715807	874700	1.21346	0.0111792	0.0409786	8.82588	3.14174	up
w05	C15H24O	2,6,10-Dodecatrienal, 3,7,11-trimethyl-	Farnesal	Terpenoids	19317-11-4	92	363657	217614	252479	2.55493e+06	1.96038e+06	2.55313e+06	1.21533	0.00675894	0.0341181	8.47789	3.08371	up
KMW0555	C15H24	trans-.alpha.-Bergamotene	trans-alpha-Bergamotene	Terpenoids	13474-59-4	62.6	879858	774113	867656	6.42883e+06	5.79927e+06	5.63912e+06	1.23333	0.00187793	0.0210397	7.08559	2.82489	up
NMW0652	C30H50	Squalene	Squalene	Terpenoids	111-02-4	87.2	21961	9207.2	13723	168845	52791	80876	1.11276	0.131796	0.191776	6.73878	2.75249	up
KMW0574	C11H12O2	2-Propenoic acid, 3-phenyl-, ethyl ester	Ethyl cinnamate	Ester	103-36-6	95.4	5.22349e+06	4.17188e+06	4.17188e+06	3.00936e+07	2.53211e+07	2.97972e+07	1.22603	0.00178861	0.0210397	6.66977	2.73764	up
NMW0149	C10H16O2	Geranic acid	Geranic acid	Terpenoids	459-80-3	73.4	41355.6	26003.7	14392.3	204515	140000	190084	1.17799	0.00861432	0.0380596	6.53931	2.70914	up
WMW0052	C15H24	(E)-1-Methyl-4-(6-methylhept-5-en-2-ylidene)cyclohex-1-ene	(E)-gamma-Bisabolene	Terpenoids	53585-13-0	84	243173	216361	225950	1.6161e+06	1.58407e+06	1.18169e+06	1.22985	0.012421	0.0415716	6.39236	2.67635	up
NMW0247	C15H22O	Furan, 3-(4,8-dimethyl-3,7-nonadienyl)-, (E)-	Dendrolasin	Terpenoids	23262-34-2	85.1	179166	110594	141195	920232	901078	834675	1.21659	3.77172e-05	0.00466031	6.16303	2.62364	up
KMW0630	C15H26O	1,6,10-Dodecatrien-3-ol, 3,7,11-trimethyl-, (E)-	Nerolidol	Terpenoids	40716-66-3	95.7	675278	431829	497336	3.28923e+06	2.48294e+06	3.62651e+06	1.20695	0.0135323	0.0421584	5.85791	2.55038	up
XMW0836	C15H26O	3,7-Cyclodecadiene-1-methanol, .alpha.,.alpha.,4,8-tetramethyl-, [s-(Z,Z)]	Hedycaryol	Terpenoids	21657-90-9	77.7	48357.8	40670.9	37524.9	247660	214174	170398	1.22297	0.0156278	0.0459196	4.99576	2.32071	up
XMW1172	C9H8O3	3,6-Dimethyl-4H-furo[3,2-c]pyran-4-one		Heterocyclic Compound	36745-38-7	61	192986	161596	138415	939584	707253	652114	1.21789	0.0181694	0.0490573	4.66322	2.22133	up
KMW0514	C11H14O2	Benzenepropanoic acid, ethyl ester	Ethyl 3-phenylpropionate	Ester	2021-28-5	84.9	97135.9	63755.8	88915.8	351298	353845	377051	1.20874	3.83564e-05	0.00466031	4.33211	2.11507	up
XMW2288	C9H20O	(S)-(+)-6-Methyl-1-octanol	(6S)-6-methyloctan-1-ol	Alcohol	110453-78-6	78.7	41486.6	47661.6	67227.2	210374	222164	171461	1.19967	0.00336559	0.0255574	3.8625	1.94953	up
XMW2488	C6H9N	3-ethyl-1H-Pyrrole	3-Ethyl-1H-pyrrole	Heterocyclic compound	1551-16-2	60	237456	269001	250426	767650	761285	928715	1.22928	0.00785438	0.0353447	3.24707	1.69914	up
XMW2650	C8H7N	1-isocyano-3-methyl-Benzene	1-Isocyano-3-methylbenzene	Nitrogen compounds	20600-54-8	72.8	312498	231299	206506	827210	628628	862680	1.18886	0.00938435	0.0385077	3.09011	1.62766	up
KMW0461	C9H18O2	Nonanoic Acid	Nonanoic acid	Acid	112-05-0	66.7	38732	39518	21734.9	92273.2	93331.2	100524	1.1779	0.00317226	0.0255574	2.86171	1.51688	up
KMW0460	C10H18O	Geraniol	Geraniol	Terpenoids	106-24-1	97.8	2.3214e+06	1.6851e+06	1.53713e+06	5.44949e+06	4.68198e+06	5.67798e+06	1.19487	0.001104	0.0178772	2.85182	1.51189	up
NMW0492	C20H34O	trans-Geranylgeraniol	Geranylgeraniol	Terpenoids	24034-73-9	76.2	17420	9106	10233	41951	34587	26623	1.12017	0.0196793	0.0525502	2.80641	1.48873	up
XMW1076	C10H18O2	4-Octenoic acid, ethyl ether		Ester	1000132-45-5	82.8	77832	73810	72944	147588	294603	152714	1.11837	0.124351	0.184252	2.6489	1.40539	up
XMW1416	C18H34O2	Dodecanoic acid, hex-3-enyl ester		Ester	1000159-94-3	70.9	178469	101442	138592	457358	317521	308759	1.12181	0.0281821	0.0631522	2.58933	1.37258	up
KMW0431	C8H10N2	5H-5-Methyl-6,7-dihydrocyclopentapyrazine	5-Methyl-6,7-dihydro-5H-cyclopenta[b]pyrazine	Heterocyclic compound	23747-48-0	75.2	63502	57015	62384	163761	199747	105065	1.1423	0.0739298	0.12221	2.56189	1.35721	up
KMW0459	C10H16O	2,6-Octadienal, 3,7-dimethyl-, (E)-	Citral	Terpenoids	141-27-5	82.7	616163	555634	458285	1.32443e+06	1.34727e+06	1.39126e+06	1.22021	0.000898994	0.0177501	2.49249	1.31759	up
KMW0613	C15H24	.alpha.-Farnesene	alpha-Farnesene	Terpenoids	502-61-4	74.5	3.83803e+06	3.06451e+06	3.73122e+06	9.23971e+06	8.68888e+06	8.26993e+06	1.21119	0.000173013	0.00901997	2.46371	1.30083	up
XMW0817	C15H24	(1S,5S,6R)-6-Methyl-2-methylene-6-(4-methylpent-3-en-1-yl)bicyclo[3.1.1]heptane		Terpenoids	15438-94-5	83.9	6.57072e+06	5.37114e+06	5.56009e+06	1.48885e+07	1.38635e+07	1.32509e+07	1.2186	0.000248244	0.00901997	2.39989	1.26297	up
XMW2847	C13H18	1,2,3,4-tetrahydro-1,6,8-trimethyl-Naphthalene	1,2,3,4-Tetrahydro-1,6,8-trimethylnaphthalene	Aromatics	30316-36-0	68.5	31617.5	23417.9	31244.5	74517.1	65568.1	63079.7	1.18596	0.0011771	0.0178772	2.35472	1.23555	up
XMW0561	C17H28O2	Farnesol, acetate		Ester	1000352-67-2	91.7	739754	463936	638706	1.57335e+06	1.22602e+06	1.49253e+06	1.14323	0.00431825	0.0305737	2.32952	1.22003	up
XMW1166	C12H12OS	2-Acetyl-3,5-dimethylbenzo(b)thiophene	2-Acetyl-3,5-dimethylbenzo(b)thiophene	Heterocyclic compound	1562995	67.3	78127	76653	67135	153621	110165	234841	1.06221	0.12633	0.18605	2.24693	1.16795	up
KMW0716	C19H38O2	Isopropyl palmitate	Isopropyl palmitate	Ester	142-91-6	78.9	42143.1	25678.4	38841.9	92759.9	64717.4	71942.1	1.09257	0.0210814	0.053924	2.15087	1.10492	up
XMW1084	C10H16O2	2-Butenoic acid, 3-hexenyl ester, (E,Z)-	cis-3-Hexenyl crotonate	Ester	65405-80-3	95.2	106145	96264.7	76514.9	164052	234102	141337	1.09878	0.0784829	0.127996	1.93418	0.951725	up
XMW1486	C17H28O2	5-Azulenemethanol, 1,2,3,4,5,6,7,8-octahydro-.alpha.,.alpha.,3,8-tetramethyl-, acetate, [3S-(3.alpha.,5.alpha.,8.alpha.)]-	2-(3,8-Dimethyl-1,2,3,4,5,6,7,8-octahydroazulen-5-yl)propan-2-yl acetate	Ester	134-28-1	79.6	88771.6	72182.8	83714.9	159158	160151	141404	1.19724	0.000949596	0.0177501	1.883	0.913034	up
XMW0963	C12H14	1H-Indene, 1,1,3-trimethyl-	1,1,3-Trimethyl-1H-indene	Aromatics	2177-45-9	61.1	14945.3	10977.3	11789	26115.5	22054.8	19188.2	1.12428	0.0204155	0.0527763	1.78615	0.836851	up
NMW0071	C10H18O	L-.alpha.-Terpineol	(-)-alpha-Terpineol	Terpenoids	10482-56-1	96.5	1.36176e+06	1.11961e+06	1.18705e+06	2.27562e+06	2.32494e+06	1.74218e+06	1.14621	0.0285874	0.0631522	1.72902	0.789951	up
KMW0304	C10H14	1,3,8-p-Menthatriene	p-Mentha-1,3,8-triene	Terpenoids	18368-95-1	87.8	96352.5	101704	93436.9	162249	180183	152637	1.22161	0.00912854	0.0382454	1.69839	0.764166	up
XMW0047	C10H14O	Phenol, 2-(1-methylpropyl)-	2-sec-Butylphenol	Phenol	89-72-5	69.5	118152	100350	84143.9	168785	133896	142762	1.06066	0.0296729	0.0646417	1.47183	0.557609	up
WMW0127	C8H16O	3-Octen-1-ol, (Z)-	cis-3-Octen-1-ol	Alcohol	20125-84-2	95.5	1.78816e+06	1.81769e+06	1.74106e+06	2.57018e+06	3.09373e+06	2.04085e+06	1.03348	0.121873	0.183945	1.44098	0.527046	up
XMW1721	C19H33F5O2	Pentafluoropropionic acid, 4-hexadecyl ester		Ester	1000283-04-1	65.3	36988.6	35144.9	33334.5	49313.9	42144.2	54006.7	1.1045	0.0506129	0.0897733	1.37923	0.463865	up
WMW0049	C13H22O	5,9-Undecadien-2-one, 6,10-dimethyl-, (Z)-	Nerylacetone	Ketone	3879-26-3	88.4	4.94915e+06	4.10178e+06	4.25115e+06	5.40387e+06	5.27429e+06	5.46547e+06	1.04768	0.0624191	0.106069	1.21362	0.279313	up
XMW3578	C18H36O	hexadecyl-Oxirane	1,2-Epoxyoctadecane	Hydrocarbons	7390-81-0	76.7	77058	64303	76602	64282	56150	53377	1.02986	0.0533895	0.0937945	0.797424	-0.32658	down
XMW1488	C19H30F3N	3-TrifluoromethylbenzylAmine, N-decyl-N-methyl-		Amine	1000310-29-2	77	186646	162692	188739	149623	129064	137645	1.1307	0.0203432	0.0527763	0.77374	-0.37008	down
XMW3696	C14H14O2	3,4'-dimethoxy-1,1'-Biphenyl	3,4'-Dimethoxybiphenyl	Aromatics	84591-12-8	69.5	39294.5	34888.4	33035.6	29581	26949.4	23194.9	1.06314	0.0250288	0.0574167	0.743578	-0.427444	down
XMW3649	C20H32	(E,E,E)-3,7,11,15-Tetramethylhexadeca-1,3,6,10,14-pentaene	(E,E,E)-3,7,11,15-Tetramethylhexadeca-1,3,6,10,14-pentaene	Hydrocarbons	77898-97-6	77.7	41328.6	32982.3	34818.4	30333.3	24342.1	24770.3	1.06597	0.0394042	0.0787932	0.727995	-0.457999	down
WMW0010	C15H24	beta-Elemen	beta-Elemene	Terpenoids	515-13-9	67.8	729560	539697	792828	496982	516101	466554	1.02319	0.120613	0.183182	0.717544	-0.478861	down
XMW0947	C11H18O2	(E)-Hex-3-enyl (E)-2-methylbut-2-enoate		Ester	1000373-74-1	98.5	1.57475e+07	1.51203e+07	1.49619e+07	1.05984e+07	1.22197e+07	9.51341e+06	1.13486	0.0216015	0.0542011	0.705471	-0.503342	down
XMW1905	C10H8O4	Fumaric acid, dipropargyl ester		Ester	1000330-54-0	65.1	196698	166705	198041	149900	126116	118168	1.11924	0.0164582	0.0465039	0.70209	-0.510271	down
XMW1373	C20H40O2	Octadecanoic acid, ethyl ester	Ethyl stearate	Ester	111-61-5	79.7	3.44901e+06	2.64328e+06	3.5379e+06	2.56415e+06	1.99225e+06	2.14581e+06	1.06047	0.0542389	0.0941433	0.695957	-0.522929	down
KMW0699	C18H38	Octadecane	Octadecane	Hydrocarbons	593-45-3	88.9	176750	150937	166615	127281	115104	100421	1.1378	0.00950809	0.0385077	0.693515	-0.528	down
KMW0676	C16H32O2	Tetradecanoic acid, ethyl ester	Ethyl tetradecanoate	Ester	124-06-1	95	6.27804e+06	4.98475e+06	6.60301e+06	4.60929e+06	3.78022e+06	3.9385e+06	1.10084	0.04526	0.0865998	0.690034	-0.53526	down
XMW2369	C10H20O4	2-(2-butoxyethoxy)-Ethanol,acetate	2-(2-Butoxyethoxy)ethyl acetate	Ester	124-17-4	69.2	1.25847e+06	1.1579e+06	992871	726823	850503	735489	1.11854	0.0248297	0.0574167	0.678396	-0.559801	down
XMW0349	C15H22O	Isolongifolen-5-one		Terpenoids	1000159-37-1	66.5	110834	87748.5	90098.7	62449.7	68977.4	63200.1	1.15078	0.0420999	0.0825022	0.674195	-0.568762	down
KMW0204	C8H16O2	Acetic acid, hexyl ester	Hexyl acetate	Ester	142-92-7	60.3	1.24022e+06	1.14198e+06	976121	700860	835609	708526	1.11597	0.022305	0.0542011	0.668488	-0.581025	down
WMW0051	C13H20O	β-Ionone	beta-Ionone	Terpenoids	14901-07-6	81.6	564763	481155	531044	366372	323742	343017	1.2051	0.00716058	0.0341181	0.65514	-0.610125	down
KMW0551	C14H30	Tetradecane	Tetradecane	Hydrocarbons	629-59-4	81.7	706259	561960	618244	323534	503881	401188	1.04155	0.0328262	0.0687652	0.651273	-0.618666	down
XMW0438	C9H12O	Furan, 2-(1-pentenyl)-, (E)-		Heterocyclic compound	20992-69-2	75.1	160639	155530	144425	84293.4	128044	87556.1	1.04306	0.050482	0.0897733	0.651101	-0.619046	down
XMW0864	C15H22O	Neoisolongifolene, 8-oxo-		Terpenoids	1000152-03-3	64.4	29109.4	25449.5	25233.9	17437.1	19353.2	15103.6	1.14848	0.00613936	0.0324319	0.650358	-0.620694	down
WMW0195	C18H34O2	Ethyl 9-hexadecenoate	Ethyl 9-hexadecenoate	Ester	54546-22-4	95.6	3.28397e+06	2.43956e+06	3.19644e+06	2.0941e+06	1.775e+06	1.89291e+06	1.13551	0.0468455	0.087156	0.645967	-0.630469	down
KMW0441	C10H12O2	Ethyl phenylacetate	Ethyl phenylacetate	Aromatics	101-97-3	78.2	5.59639e+06	4.25181e+06	3.68831e+06	3.06426e+06	3.03472e+06	2.52693e+06	1.04361	0.0907881	0.144734	0.637234	-0.650106	down
XMW1539	C16H17N3O2	1-(bicyclo[3.2.1]oct-2-en-4-yl)-4-phenyl-1,2,4-Triazolidine-3,5-dione		Heterocyclic compound	1000142-36-0	60.2	15208.9	11798	13899	9301.73	9676.12	6763.85	1.07972	0.0203136	0.0527763	0.62929	-0.668203	down
KMW0642	C16H34	Hexadecane	Hexadecane	Hydrocarbons	544-76-3	92	589851	520870	629151	352397	387492	339758	1.20167	0.00991743	0.0388699	0.620533	-0.688421	down
XMW1371	C19H38O2	Heptadecanoic acid, ethyl ester	Ethyl heptadecanoate	Ester	14010-23-2	90.1	1.22584e+06	781293	1.24891e+06	805147	571324	630387	1.01052	0.0944842	0.149089	0.616348	-0.698184	down
XMW3619	C4H2N2	Fumaronitrile	Fumaronitrile	Nitrogen compounds	764-42-1	61.7	1.45485e+06	1.43932e+06	1.44605e+06	1.03544e+06	965627	606333	1.04143	0.0489531	0.0887732	0.600755	-0.735152	down
XMW3193	C16H33I	1-iodo-Hexadecane	1-Iodohexadecane	Halogenated hydrocarbons	544-77-4	61.7	80557.6	75993.4	78931.4	50446	51892.8	38654.4	1.15997	0.0112986	0.0409786	0.598742	-0.739994	down
XMW3115	CBrN	Cyanogen bromide	Cyanogen bromide	Halogenated hydrocarbons	506-68-3	66.6	2.04552e+06	2.01094e+06	2.01718e+06	1.42006e+06	1.35399e+06	852713	1.05303	0.0445569	0.0859311	0.597131	-0.743881	down
KMW0158	C7H6O	BenzAldehyde	Benzaldehyde	Aldehyde	100-52-7	89.5	2.03936e+06	2.02388e+06	2.05371e+06	1.4252e+06	1.3373e+06	813543	1.04193	0.0469853	0.087156	0.584614	-0.774444	down
XMW2751	C14H30	5-methyl-Tridecane	5-Methyltridecane	Hydrocarbons	25117-31-1	67.3	60472.4	62460.2	75348.8	35592.7	47343.8	32932.5	1.11912	0.0130018	0.0415716	0.584367	-0.775055	down
XMW3683	C12H14O	4-(1,1-dimethyl-2-propynyloxy)-Toluene	4-(1,1-dimethylpropynoxy)toluene	Aromatics	82719-54-8	70	69805	68303	67379.2	39679.1	45979.1	33472.1	1.16796	0.0128557	0.0415716	0.579746	-0.786507	down
XMW0667	C16H30O2	Ethyl 9-tetradecenoate		Ester	1000336-60-8	68.7	142984	91062.8	132371	87366.8	68951.3	55144.5	1.03459	0.0615927	0.105402	0.577109	-0.793085	down
XMW0555	C10H8O2	2-Acetylbenzofuran	2-Acetylbenzofuran	Heterocyclic compound	1646-26-0	73.7	67968	67828	69945	40934	47946	29815	1.10381	0.0297937	0.0646417	0.576915	-0.79357	down
XMW0511	C20H40O	3,7,11,15-Tetramethyl-2-hexadecen-1-ol	3,7,11,15-Tetramethylhexadec-1-en-2-ol	Terpenoids	102608-53-7	86.2	44789.4	41049.1	69712.4	32604.3	24341.1	32556.3	1.03794	0.124221	0.184252	0.575385	-0.797401	down
XMW0151	C15H24	Epizonarene	10-Epizonarene	Terpenoids	41702-63-0	78.8	2.12561e+06	1.73362e+06	2.04137e+06	1.11139e+06	1.32914e+06	926720	1.14365	0.00713027	0.0341181	0.57066	-0.809296	down
ZMW0001	C23H48	Tricosane	Tricosane	Hydrocarbons	638-67-5	95.5	384789	274237	367408	246657	180727	157094	1.07992	0.0302596	0.0648857	0.569427	-0.812418	down
XMW1368	C17H34O2	Pentadecanoic acid, ethyl ester	Ethyl pentadecanoate	Ester	41114-00-5	92.3	1.27625e+06	964641	1.46052e+06	812367	596457	665327	1.11968	0.0474798	0.0872504	0.560367	-0.835555	down
XMW3736	C14H22O2	5,6,6-trimethyl-Undeca-3,4-diene-2,10-dione		Ketone	90165-10-9	65.2	468767	333213	341667	204433	206831	226163	1.15906	0.0581454	0.100208	0.557364	-0.84331	down
XMW0230	C19H40	Pentadecane, 2,6,10,14-tetramethyl-	Pristane	Hydrocarbons	1921-70-6	69.8	75521.8	66643	71231.6	46854	38326	32554.8	1.1644	0.00524229	0.0318469	0.551719	-0.857994	down
KMW0404	C10H8	Naphthalene	Naphthalene	Aromatics	91-20-3	77.8	229541	209561	187049	104973	127052	108841	1.18744	0.00577016	0.031867	0.544383	-0.877305	down
XMW1410	C15H24	Cycloheptane, 4-methylene-1-methyl-2-(2-methyl-1-propen-1-yl)-1-vinyl-		Terpenoids	1000159-38-5	74.7	809749	541719	748018	353569	407586	333833	1.15608	0.0456486	0.086661	0.52155	-0.939122	down
XMW1017	C16H28	1,E-11,Z-13-Hexadecatriene	(11E,13Z)-1,11,13-Hexadecatriene	Hydrocarbons	80634-97-5	63.5	105783	99920.5	98606.7	49957.5	65335.3	43357	1.15597	0.0109482	0.0409431	0.521342	-0.939698	down
KMW0282	C9H18O	Nonanal	Nonanal	Aldehyde	124-19-6	93.3	1.10206e+06	1.1288e+06	1.15012e+06	425303	837673	496260	1.05912	0.049693	0.0894474	0.520334	-0.94249	down
XMW0060	C15H20	.alpha.-Dehydro-ar-himachalene		Terpenoids	78204-62-3	71.9	102329	95397.1	99816.5	53409.8	59606.7	41572	1.17422	0.00612828	0.0324319	0.51955	-0.944665	down
XMW0392	C15H20	.alpha.-Corocalene	alpha-Corocalene	Terpenoids	20129-39-9	80	958039	909445	931814	477483	587482	384434	1.15752	0.0128643	0.0415716	0.517772	-0.949611	down
D201	C20H38O2	Ethyl Oleate	Ethyl oleate	Ester	111-62-6	91.5	944107	630325	887225	490007	353828	427657	1.13956	0.0395587	0.0787932	0.516519	-0.953107	down
KMW0683	C17H36	Heptadecane	Heptadecane	Hydrocarbons	629-78-7	86.7	309510	257151	298891	149237	169935	127286	1.18947	0.00287005	0.0249079	0.515807	-0.955096	down
XMW1931	C11H20O	(2E)-1-Methoxy-3,7-dimethylocta-2,6-diene		Ether	1000333-79-3	81.3	268758	207830	250087	135961	139585	97477.4	1.1512	0.00782898	0.0353447	0.513329	-0.962046	down
XMW0139	C15H18	6-Isopropyl-1,4-dimethylnaphthalene	6-Isopropyl-1,4-dimethylnaphthalene	Terpenoids	489-77-0	85.6	457250	499698	430279	231571	287902	184526	1.13867	0.00493197	0.0316361	0.507487	-0.978558	down
XMW0532	C6H10N4	1H-Pyrazole-1-carboximidamide, 3,5-dimethyl-	3,5-Dimethylpyrazole-1-carboxamidine	Heterocyclic compound	22906-75-8	67	23718.6	23264.9	25370.5	7899.66	19040.7	9692.22	1.00464	0.0702646	0.117754	0.506297	-0.981944	down
XMW1372	C19H36O2	(Z)-Ethyl heptadec-9-enoate		Ester	1089325-29-0	93.1	199864	113454	169491	93821	71964	74954	1.10767	0.076985	0.126401	0.498622	-1.00398	down
XMW3693	C11H18O2	(Z)-(Z)-Hex-3-en-1-yl 2-methylbut-2-enoate	(Z)-3-Hexenyl Angelate	Ester	84060-80-0	64.8	1.20777e+06	896217	770700	460375	546433	407148	1.12357	0.053652	0.0937945	0.491865	-1.02367	down
KMW0434	C10H16O	2,6,6-trimethyl-1-Cyclohexene-1-carboxaldehyde	beta-Cyclocitral	Terpenoids	432-25-7	77.8	486271	428281	424060	220615	236506	196847	1.21425	0.0017052	0.0210397	0.488542	-1.03344	down
XMW0852	C11H10F3NO3	l-Alanine, N-(2,3,4-trifluorobenzoyl)-, methyl ester		Ester	1000299-62-7	82.6	175491	140357	174011	78023.7	82078.5	77141.6	1.22282	0.0167077	0.0466663	0.48431	-1.046	down
KMW0604	C15H24	(1S,2E,6E,10R)-3,7,11,11-Tetramethylbicyclo[8.1.0]undeca-2,6-diene	3,6,6,9-Tetramethyl-4,4a,5,6,7,9a-hexahydro-1h-benzo[7]annulene	Terpenoids	24703-35-3	91.9	554116	384914	575050	223607	281938	221169	1.16035	0.0380228	0.0769962	0.479971	-1.05898	down
XMW0993	C13H16N2	Pyrimido[1,6-a]indole, 1,2,3,4-tetrahydro-2,5-dimethyl-	2,5-Dimethyl-1,2,3,4-tetrahydropyrimido(3,4-a)indole	Heterocyclic compound	22106-07-6	67.5	196234	194060	197870	91815.9	116266	72813.4	1.16014	0.0142028	0.043141	0.477579	-1.06619	down
ZMW0002	C24H50	Tetracosane	Tetracosane	Hydrocarbons	646-31-1	94.4	565683	514250	501247	315279	236295	195364	1.1573	0.00538986	0.031867	0.472393	-1.08194	down
XMW2967	C8H16N4	tetrahydro-1H,5H,7H,11H-Dipyrazolo[1,2-a:1',2'-d][1,2,4,5]tetrazine	1H,5H,7H,11H-Dipyrazolo(1,2-a:1',2'-d)(1,2,4,5)tetrazine, tetrahydro-	Heterocyclic compound	37882-92-1	62.1	125394	123137	112123	55712.2	57944	55982.3	1.22804	0.00332692	0.0255574	0.470364	-1.08815	down
XMW0383	C15H24	1,4,7,-Cycloundecatriene, 1,5,9,9-tetramethyl-, Z,Z,Z-		Hydrocarbons	1000062-61-9	71.6	1.19196e+06	1.00118e+06	1.21609e+06	499734	590658	494620	1.21627	0.00494722	0.0316361	0.464917	-1.10496	down
KMW0302	C10H18O	(2S,4R)-4-Methyl-2-(2-methylprop-1-en-1-yl)tetrahydro-2H-pyran	(2S,4R)-4-methyl-2-(2-methylprop-1-en-1-yl)tetrahydro-2H-pyran	Terpenoids	3033-23-6	71.3	135878	128821	146266	51275.7	94838.1	44521.1	1.07066	0.0332599	0.0690782	0.463872	-1.1082	down
XMW1102	C11H10O2	Vinyl trans-cinnamate	Ethenyl 3-phenyl-2-propenoate	Ester	17719-70-9	84.7	116439	98240.5	80403.7	48505.2	40444.6	47204.7	1.17751	0.0307072	0.0648857	0.46141	-1.11588	down
XMW0136	C15H20	4-Isopropyl-6-methyl-1-methylene-1,2,3,4-tetrahydronaphthalene	beta-Calacorene	Terpenoids	50277-34-4	93.3	8.77076e+06	7.82037e+06	8.65242e+06	3.73886e+06	4.49685e+06	3.10427e+06	1.1927	0.00110329	0.0178772	0.449223	-1.1545	down
KMW0618	C15H24	Naphthalene, 1,2,3,5,6,8a-hexahydro-4,7-dimethyl-1-(1-methylethyl)-, (1S-cis)-	(+)-delta-Cadinene	Terpenoids	483-76-1	93.5	1.97474e+07	1.61623e+07	1.89042e+07	7.53835e+06	9.42166e+06	7.20333e+06	1.20559	0.00260296	0.0234266	0.440824	-1.18172	down
KMW0316	C10H18O	(2R,4R)-4-Methyl-2-(2-methylprop-1-en-1-yl)tetrahydro-2H-pyran	trans-Rose oxide	Terpenoids	5258-11-7
KMW0485	C13H26O2	Undecanoic acid, ethyl ester	Ethyl undecanoate	Ester	627-90-7	61.7	121055	120240	151884	54986.8	64111.4	51658.9	1.20886	0.0116934	0.0414988	0.434298	-1.20324	down
WMW0012	C15H24	(+)-epi-Bicyclosesquiphellandrene		Terpenoids	54274-73-6	87.5	7.68329e+06	5.29297e+06	7.52975e+06	2.72622e+06	3.32581e+06	2.74602e+06	1.1905	0.0306226	0.0648857	0.429048	-1.22079	down
XMW2985	C16H28	1,3-di-n-Propyladamantane		Hydrocarbons	40002-47-9	62.4	174582	144537	171573	72453.4	63037.4	73381.5	1.22836	0.00553818	0.031867	0.425669	-1.2322	down
XMW3068	C11H18O	2,6,6-trimethyl-1-Cyclohexene-1-acetAldehyde	2,6,6-Trimethyl-1-cyclohexene-1-acetaldehyde	Aldehyde	472-66-2	74.6	126979	111280	111532	46727.9	58316.7	41718	1.19981	0.000704783	0.0171262	0.419573	-1.25301	down
KMW0542	C12H24O2	Decanoic acid, ethyl ester	Ethyl decanoate	Ester	110-38-3	80.5	833919	874568	974917	331820	379373	389781	1.22684	0.00221962	0.0224737	0.41029	-1.28528	down
KMW0143	C7H16O	2-Heptanol	2-Heptanol	Alcohol	543-49-7	94.1	9.17811e+06	8.94968e+06	1.00114e+07	3.44401e+06	5.97669e+06	1.90405e+06	1.02826	0.0345415	0.0711321	0.402455	-1.3131	down
D423	C12H14O2	Benzyl tiglate	Benzyl tiglate	Ester	37526-88-8	64.6	9.54581e+06	6.58756e+06	9.24713e+06	3.10646e+06	3.94817e+06	3.14939e+06	1.19361	0.0253427	0.057554	0.402042	-1.31458	down
XMW0662	C11H10	Naphthalene, 2-methyl-	2-Methylnaphthalene	Aromatics	91-57-6	85.1	107839	102320	97684.4	41337.3	38053.9	44312.6	1.23074	0.000204612	0.00901997	0.401841	-1.3153	down
XMW0822	C15H24	Tricyclo[4.4.0.02,7]decane, 1-methyl-3-methylene-8-(1-methylethyl)-, stereoisomer	cis-beta-Copaene	Terpenoids	18252-44-3	97.4	6549803	4577159	6424685	2.025e+06	2609656	2385077	1.19835	0.025046	0.0574167	0.399947	-1.32212	down
KMW0594	C14H28O2	Dodecanoic acid, ethyl ester	Ethyl dodecanoate	Ester	106-33-2	93.1	4.26378e+06	3.69711e+06	4.90691e+06	1.86008e+06	1.59983e+06	1.63604e+06	1.22381	0.014011	0.0430973	0.396023	-1.33634	down
KMW0616	C15H24	(1.alpha.,4a.beta.,8a.alpha.)-1,2,3,4,4a,5,6,8a-octahydro-7-methyl-4-methylene-1-(1-methylethyl)-Naphthalene	gamma-Cadinene	Terpenoids	39029-41-9	97.4	1.45049e+07	1.13655e+07	1.46687e+07	5.05728e+06	6.39727e+06	4.59137e+06	1.19984	0.00688032	0.0341181	0.395814	-1.33711	down
XMW0176	C15H24	[1α,4aα,8aα]-1,2,4a,5,6,8a-hexahydro-4-7-dimethyl-1-[1-methylethyl]naphthalene		Terpenoids	31983-22-9	97.4	4.82094e+06	3.65413e+06	4.76226e+06	1.66295e+06	2.06575e+06	1.50095e+06	1.19964	0.00982905	0.0388699	0.395068	-1.33983	down
XMW0614	C11H22O2	Nonanoic acid, ethyl ester	Ethyl nonanoate	Ester	123-29-5	96.4	2.29076e+06	2.77253e+06	2.47932e+06	761387	1.18353e+06	1.02284e+06	1.17864	0.0013078	0.0180885	0.393465	-1.34569	down
XMW2049	C11H20O2	Hexyl (E)-2-methylbut-2-enoate		Ester	1000373-74-3	93.5	2.37793e+06	2.21107e+06	2.35629e+06	861262	1.05957e+06	803375	1.21724	0.000259835	0.00901997	0.392238	-1.3502	down
XMW0197	C15H24	(1S,4S,4aS)-1-Isopropyl-4,7-dimethyl-1,2,3,4,4a,5-hexahydronaphthalene		Terpenoids	267665-20-3	96.5	4.96191e+06	3.42972e+06	4.94962e+06	1.61193e+06	2.09684e+06	1.52385e+06	1.18471	0.0236432	0.0563266	0.392214	-1.35029	down
KMW0626	C15H22	Naphthalene, 1,2,3,4-tetrahydro-1,6-dimethyl-4-(1-methylethyl)-, (1S-cis)-	Calamenene	Terpenoids	483-77-2	88.4	9.64576e+06	9.77442e+06	1.08273e+07	3.62486e+06	5.17192e+06	2.69062e+06	1.15155	0.00459943	0.0310462	0.379781	-1.39676	down
XMW3570	C15H24S	(1S,3aR,4R,8R,8aS)-1-Isopropyl-3a-methyl-7-methylenedecahydro-4,8-epithioazulene	4,8-Epithioazulene, decahydro-3a-methyl-7-methylene-1-(1-methylethyl)-, (1S-(1alpha,3aalpha,4alpha,8alpha,8aalpha))-	Sulfur compounds	72445-42-2	79	705142	588402	621853	216920	271317	236359	1.22187	0.00253142	0.0234266	0.378301	-1.4024	down
XMW0390	C16H30O4	2,2,4-Trimethyl-1,3-pentanediol diisobutyrate	2,2,4-Trimethyl-1,3-pentanediol diisobutyrate	Ester	6846-50-0	89.1	1.75433e+06	1.40274e+06	1.54102e+06	715910	414111	643827	1.17433	0.00216253	0.0224737	0.377567	-1.40519	down
KMW0545	C12H24O	Dodecanal	Dodecanal	Aldehyde	112-54-9	64.3	128046	85538.9	124456	37441.7	53968.6	35055.2	1.168	0.0217421	0.0542011	0.374113	-1.41846	down
WMW0004	C15H24	Ylangene	Unii-05V1kjo52Z	Terpenoids	14912-44-8	97	1.72812e+06	1.38321e+06	1.81026e+06	574774	768702	470930	1.18188	0.00440362	0.0305737	0.368663	-1.43962	down
KMW0590	C15H24	Naphthalene, 1,2,3,5,6,7,8,8a-octahydro-1,8a-dimethyl-7-(1-methylethenyl)-, [1R-(1.alpha.,7.beta.,8a.alpha.)]-	Valencene	Terpenoids	997297	82.6	487506	353673	478277	152594	197271	134832	1.1923	0.0126481	0.0415716	0.367346	-1.44479	down
KMW0614	C15H24	Cubenene	Pentacyclo[4.2.0.0~2,5~.0~3,8~.0~4,7~]octa-1,3-diene	Terpenoids	29837-12-5	93.6	5.02964e+06	3.75728e+06	4.96168e+06	1.57296e+06	2.05842e+06	1.39714e+06	1.19438	0.00903044	0.0382454	0.365748	-1.45108	down
WMW0053	C15H24	Benzene, 1-(1,5-dimethylhexyl)-4-methyl-	Benzene, 1-(1,5-dimethylhexyl)-4-methyl-	Terpenoids	1461-02-5	67.8	902356	644847	955705	273656	366592	267415	1.19203	0.0220745	0.0542011	0.362643	-1.46338	down
KMW0113	C7H14O	2-Heptanone	2-Heptanone	Ketone	110-43-0	74.7	255457	249852	291693	98549.2	146588	42813.1	1.03392	0.0174018	0.0480528	0.361291	-1.46877	down
XMW2189	C7H7Cl	Benzyl chloride	Benzyl chloride	Halogenated hydrocarbons	100-44-7	71.2	67239.2	59337.1	68562.1	20921.5	28515.7	20009.9	1.2079	0.000455227	0.0122911	0.355886	-1.49051	down
XMW1365	C17H32O2	cis-9-Tetradecenoic acid, propyl ester		Ester	1000405-14-2	70.1	82561.3	82332.4	104545	34594.7	25845.2	32752.9	1.2167	0.0087953	0.0381653	0.345878	-1.53167	down
KMW0552	C15H24	(-)-.beta.-Bourbonene	beta-Bourbonene	Terpenoids	5208-59-3	89.3	2.16158e+06	1.71293e+06	2.99478e+06	566107	976867	826223	1.15197	0.0465425	0.087156	0.344897	-1.53576	down
D279	C26H52O2	Ethyl tetracosanoate	Ethyl tetracosanoate	Ester	24634-95-5	69.6	11748.1	9279.59	10549.6	5705.3	2571.23	2603.19	1.12174	0.00766662	0.0353447	0.344543	-1.53725	down
XMW0465	C15H24	1-Isopropyl-4,7-dimethyl-1,2,3,4,5,6-hexahydronaphthalene	Naphthalene, 1,2,3,4,5,6-hexahydro-4,7-dimethyl-1-(1-methylethyl)-	Terpenoids	16729-00-3	81	5.6714e+06	4.56755e+06	5.87289e+06	1.75824e+06	2.24933e+06	1.48889e+06	1.20156	0.00411806	0.0303239	0.341144	-1.55155	down
XMW0307	C8H10	p-Xylene	p-Xylene	Aromatics	106-42-3	74.8	390141	533345	424399	106590	253219	96029.9	1.07032	0.0117836	0.0414988	0.338188	-1.5641	down
WMW0002	C15H24	.alfa.-Copaene		Terpenoids	1000360-33-0	93.6	6.54412e+06	5.06066e+06	6.64305e+06	1.78575e+06	2.49835e+06	1.63639e+06	1.19885	0.00564909	0.031867	0.324449	-1.62394	down
XMW1671	C15H24	9-Methyltetracyclo[7.3.1.0(2.7).1(7.11)]tetradecane		Hydrocarbons	1000215-30-5	82.3	703675	542914	740750	201953	248277	190619	1.21656	0.0125086	0.0415716	0.322466	-1.63278	down
XMW1312	C20H28CoN2	Cobalt, bis(.eta.-5-piperidinylcyclopentadienyl)-		Heterocyclic compound	1000162-04-6	75.9	6766	6441	6318.99	3167	2253.33	687	1.01084	0.0222136	0.0542011	0.312779	-1.67678	down
KMW0566	C15H24	(4aR-trans)-decahydro-4a-methyl-1-methylene-7-(1-methylethylidene)-Naphthalene	Selina-4(15),7(11)-diene	Terpenoids	515-17-3	88.6	523336	400709	555666	145337	183679	124592	1.20648	0.0109519	0.0409431	0.306552	-1.7058	down
XMW1127	C9H18O2	Formic acid, octyl ester	Octyl formate	Ester	112-32-3	96.5	1.05781e+06	1.05726e+06	914190	258715	334427	200031	1.19925	0.000336522	0.0102219	0.261837	-1.93326	down
KMW0557	C9H10O3	Ethyl salicylate	Ethyl salicylate	Ester	118-61-6	85.3	497985	404200	427021	125149	137238	79078	1.19592	0.00133989	0.0180885	0.256894	-1.96076	down
XMW0296	C10H20O2	Acetic acid, octyl ester	Octyl acetate	Ester	112-14-1	81.7	985794	1.0109e+06	881932	237532	295699	147452	1.18318	0.000244122	0.00901997	0.236461	-2.08033	down
XMW1206	C8H14O2	3-Hexenoic acid, ethyl ester	Ethyl 3-hexenoate	Ester	2396-83-0	96.9	1.51961e+07	1.48664e+07	1.43372e+07	2.45511e+06	5.31136e+06	2.21058e+06	1.16123	0.00510777	0.0318253	0.22471	-2.15386	down
XMW0763	C20H32	(4aR,6aS,9R,11aR,11bR)-4,4,11b-trimethyl-8-methylenetetradecahydro-6a,9-methanocyclohepta[a]naphthalene	ent-Kaurene	Terpenoids	562-28-7	95.6	231019	126853	208070	34172	25741	24456	1.21868	0.0355775	0.0726499	0.149077	-2.74587	down
XMW3721	C15H24	Aciphyllene	(5S,8S,8aS)-3,8-dimethyl-5-prop-1-en-2-yl-1,2,4,5,6,7,8,8a-octahydroazulene	Terpenoids	87745-31-1	84.3	356489	239432	341205	32171.8	50614.5	42360	1.22444	0.0163289	0.0465039	0.133543	-2.90463	down
XMW0143	C15H24	1H-3a,7-Methanoazulene, 2,3,4,7,8,8a-hexahydro-3,6,8,8-tetramethyl-, [3R-(3.alpha.,3a.beta.,7.beta.,8a.alpha.)]-	Cedr-8-ene	Terpenoids	469-61-4	79.1	152158	98051.4	141660	11775.8	19840.5	12860.4	1.22041	0.0179944	0.0490573	0.113499	-3.13925	down
XMW3645	C9H10O3	Ethyl 3-hydroxybenzoate	Ethyl 3-hydroxybenzoate	Ester	7781-98-8	80.4	271282	186014	213062	23667.1	17987.3	22757.4	1.23385	0.014807	0.044421	0.0960855	-3.37954	down
KMW0689	C14H12O2	Benzyl Benzoate	Benzyl benzoate	Ester	120-51-4	92.5	3.99396e+06	2.23745e+06	3.12081e+06	254858	160124	161962	1.22775	0.0283675	0.0631522	0.0616907	-4.0188	down
XMW3154	C8H7N	2-methyl-Benzonitrile	o-Tolunitrile	Nitrogen compounds	529-19-1	94.5	1.19101e+06	918763	797022	60275.1	48002.7	56968	1.23255	0.0157831	0.0459196	0.0568481	-4.13674	down
KMW0472	C8H7N	Indole	Indole	Heterocyclic compound	120-72-9	86	1.1522e+06	880397	771948	54705.1	47018.3	45909.7	1.2327	0.0158734	0.0459196	0.0526407	-4.24768	down
XMW0871	C14H12O3	Benzyl salicylate	Benzyl salicylate	Ester	118-58-1	84.6	791947	398744	512853	50032.9	15786	15786	1.19862	0.0424689	0.0825594	0.047903	-4.38374	down
XMW0474	C13H16O2	3-Hexen-1-ol benzoate		Ester	1000132-06-6	90.3	3.31608e+06	2.39282e+06	2.41051e+06	139749	97635.8	102312	1.23343	0.0134091	0.0421584	0.0418376	-4.57905	down
XMW0272	C6H6N2O	4-Pyridinecarboxamide	Isonicotinamide	Heterocyclic compound	1453-82-3	71.2	3.01223e+07	2.95485e+07	2.72316e+07	1.24113e+06	1.29001e+06	1.04197e+06	1.23512	0.00093753	0.0177501	0.0411163	-4.60415	down
XMW0471	C13H16O2	3-Hexen-1-ol, benzoate, (Z)-	cis-3-Hexenyl benzoate	Ester	25152-85-6	94.5	3.25825e+06	2.36378e+06	2.39246e+06	133713	96194.3	96038.5	1.23363	0.0127419	0.0415716	0.0406696	-4.61991	down
XMW0473	C13H18O2	Hexyl benzoate	Hexyl benzoate	Ester	6789-88-4	81.5	462643	343767	349103	7579.05	6131.65	5693.63	1.23617	0.0103048	0.0397469	0.0167928	-5.89601	down
KMW0267	C8H8O2	Methyl benzoate	Methyl benzoate	Ester	93-58-3	84.4	905601	819591	766966	15524.7	13405.8	10680.1	1.23503	0.00240927	0.0234181	0.0158941	-5.97537	down
